# Supplementary material for: Trifunctionalization of CC bonds in vinyl azides to access densely functionalized phenanthridines enabled by the NCS/AgNO2 system
Source: Royal Society of Chemistry journal article supplement (doi:10.1039/d4ob00905c), 2024-01-01

## Electronic Supplementary Information

### Trifunctionalization of C=C Bonds in Vinyl Azides to Access Densely Functionalized Phenanthridines Enabled by the NCS/AgNO<sub>2</sub> System

Shaobo Ren, <sup>\*a,b</sup> Jian Zhu,<sup>b</sup> and Yunkui Liu<sup>\*b</sup>

<sup>a</sup>College of Pharmacy, Jinhua Polytechnic, Jinhua, 321007, P. R. China.

<sup>b</sup>State Key Laboratory Breeding Base of Green Chemistry-Synthesis Technology, College of Chemical Engineering, Zhejiang University of Technology, Hangzhou 310014, P. R. China

Email: 1099767331@qq.com; ykuiliu@zjut.edu.cn

### Contents

|     |                                                                        |     |
|-----|------------------------------------------------------------------------|-----|
| 1.  | General Information                                                    | S2  |
| 2.  | Synthesis of the Starting Materials                                    | S2  |
| 3.  | Typical Procedure for the Synthesis of Target Products <b>2</b>        | S2  |
| 3.1 | Procedure for 1 mmol-Scale Synthesis of <b>2a</b>                      | S3  |
| 4.  | Characterization Data                                                  | S3  |
| 5.  | References                                                             | S11 |
| 6.  | X-Ray Diffraction Analysis                                             | S11 |
| 7.  | <sup>1</sup> H NMR and <sup>13</sup> C NMR Spectra of All the Products | S13 |

## 1. General Information

Unless otherwise noted, all reactions were carried out in flame-dried reaction vessels with Teflon screw caps under nitrogen. Solvents were purified and dried according to standard methods prior to use. Unless otherwise stated, all reagents were purchased from commercial suppliers and used as received. Flash column chromatography was performed on silica gel (100-200 mesh) with the indicated eluent solvents. TLC analysis was performed on pre-coated, glass-backed silica gel plates and visualized with UV light.

Melting points are uncorrected.  $^1\text{H}$  NMR spectra were recorded on a spectrometer at 25 °C in  $\text{CDCl}_3$  at 500 MHz, with TMS as internal standard.  $^{13}\text{C}$  NMR spectra were recorded on a spectrometer at 25 °C in  $\text{CDCl}_3$  at 125 MHz.  $^{19}\text{F}$  NMR spectra were recorded on a Bruker AVANCE III 500 at 25 °C in  $\text{CDCl}_3$  at 470 MHz, with  $\text{CF}_3\text{COOH}$  as external standard. Chemical shifts ( $\delta$ ) are expressed in ppm and coupling constants  $J$  are given in Hz. Chemical shifts ( $\delta$ ) are expressed in ppm and coupling constants  $J$  are given in Hz. The following abbreviations were used to identify the multiplicities: s = singlet, d = doublet, t = triplet, q = quartet, m = multiplet, dd = doublet of doublets, dt = doublet of triplets, dq = doublet of quartets, br = broad and all combinations thereof can be explained by their integral parts. High resolution mass spectra (HRMS) were obtained on a Bruker micro TOF-Q II instrument with APCI source or Agilent 6200 series TOF/6500 series Q-TOF instrument with ESI source or Waters GCT Premier TOF MS with EI source.

## 2. Synthesis of the Starting Materials

The starting materials 2-(1-azidovinyl)-1,1'-biphenyls were prepared according previous work.<sup>1,2</sup>

## 3. Typical Procedure for the Synthesis of Target products 2

A mixture of vinyl azide **1** (0.3 mmol), NCS (89.4 mg, 0.66 mmol),  $\text{AgNO}_2$  (101.6 mg, 0.66 mmol) and  $\text{CH}_3\text{CN}$  (3.0 mL) was sealed in a 10 mL round flask. Then the flask was stirred at 25 °C for 5 h. Upon completion of the reaction, the solution was evaporated in vacuo and the residue was purified by flash column chromatography on silica gel with petroleum ether/EtOAc as eluent to give pure product **2**.

### 3.1 Procedure for 1 mmol-Scale Synthesis of 2a

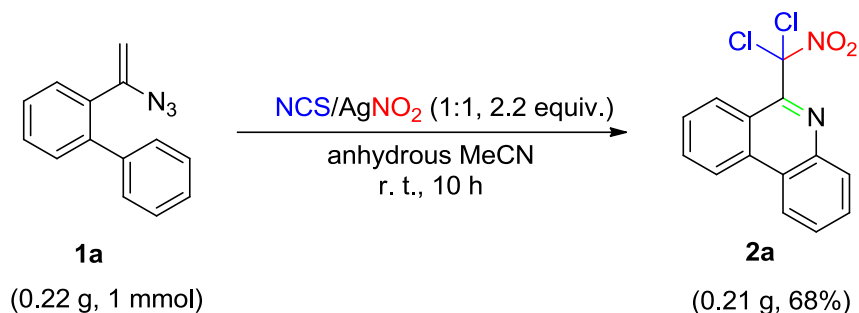

A mixture of vinyl azide **1a** (0.22 g, 1.0 mmol), NCS (0.30 g, 2.2 mmol), AgNO<sub>2</sub> (0.34 g, 2.2 mmol) and CH<sub>3</sub>CN (8.0 mL) was sealed in a 20 mL round flask. Then the flask was stirred at 25 °C for 10 h. Upon completion of the reaction, the solution was evaporated in vacuo and the residue was purified by flash column chromatography on silica gel with petroleum ether/EtOAc as eluent to give pure product **2a** (0.21 g, 68%).

## 4. Characterization Data

### 6-(dichloro(nitro)methyl)phenanthridine(2a)

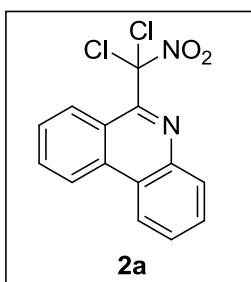

Purified by column chromatography (petroleum ether/EtOAc = 5/1 (V/V)) as a yellow solid (69.1 mg, 75%), m.p. 121–122 °C. **<sup>1</sup>H NMR** (500 MHz, CDCl<sub>3</sub>): δ 8.74 (d, *J* = 8.5 Hz, 1H), 8.61–8.57 (m, 2H), 8.19–8.15 (m, 1H), 7.95–7.92 (m, 1H), 7.81–7.77 (m, 3H); **<sup>13</sup>C NMR** (125 MHz, CDCl<sub>3</sub>): δ 149.9, 140.8, 134.7, 131.3,

131.3, 129.50, 129.49, 127.6, 126.2, 125.0, 123.17, 121.9, 120.8, 113.9; **HRMS** (ESI) *m/z*: [M+H]<sup>+</sup> Calcd for C<sub>14</sub>H<sub>9</sub>Cl<sub>2</sub>N<sub>2</sub>O<sub>2</sub><sup>+</sup> 307.0036; Found 307.0043.

### 3-butyl-6-(dichloro(nitro)methyl)phenanthridine (2b)

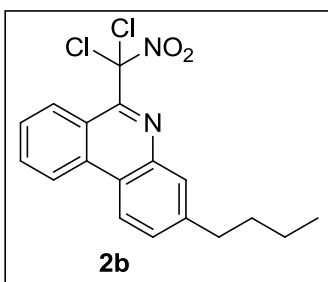

Purified by column chromatography (petroleum ether/EtOAc = 5/1 (V/V)) as a yellow solid (69.7 mg, 64%), m.p. 69–70 °C. **<sup>1</sup>H NMR** (500 MHz, CDCl<sub>3</sub>): δ 8.69 (d, *J* = 8.5 Hz, 1H), 8.58 (d, *J* = 8.5 Hz, 1H), 8.48 (d, *J* = 8.5 Hz,

1H), 7.97 (d, *J* = 1.5 Hz, 1H), 7.92–7.88 (m, 1H), 7.75–7.72 (m, 1H), 7.62 (dd, *J*<sub>1</sub> = 8.5

Hz,  $J_2 = 1.5$  Hz, 1H), 2.85 (t,  $J = 8.0$  Hz, 2H), 1.77–1.71 (m, 2H), 1.46–1.38 (m, 2H), 0.98 (t,  $J = 8.0$  Hz, 3H);  $^{13}\text{C}$  NMR (125 MHz,  $\text{CDCl}_3$ ):  $\delta$  149.8, 144.9, 141.0, 134.7, 131.1, 130.7, 130.1, 127.1, 126.2, 123.0, 122.9, 121.7, 120.5, 114.0, 35.4, 33.3, 22.4, 13.9; HRMS (ESI)  $m/z$ :  $[\text{M}+\text{H}]^+$  Calcd for  $\text{C}_{18}\text{H}_{17}\text{Cl}_2\text{N}_2\text{O}_2^+$  363.0662; Found 363.0657.

### 6-(dichloro(nitro)methyl)-3-methylphenanthridine (2c)

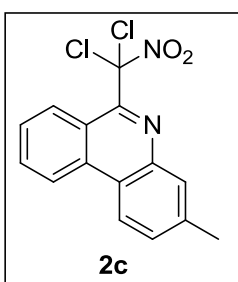

Purified by column chromatography (petroleum ether/EtOAc = 5/1 (V/V)) as a yellow solid (63.5 mg, 66%), m.p. 136–137 °C.  $^1\text{H}$  NMR (500 MHz,  $\text{CDCl}_3$ ):  $\delta$  8.66 (d,  $J = 8.5$  Hz, 1H), 8.58 (d,  $J = 8.5$  Hz, 1H), 8.44 (d,  $J = 8.5$  Hz, 1H), 7.95 (s, 1H), 7.91–7.87 (m, 1H), 7.75–7.71 (m, 1H), 7.59 (dd,  $J_1 = 8.5$  Hz,  $J_2 = 1.5$  Hz, 1H), 2.58 (s, 3H);  $^{13}\text{C}$  NMR (125 MHz,  $\text{CDCl}_3$ ):  $\delta$  149.8, 140.9, 139.9, 134.7, 131.3, 131.1, 130.7, 127.0, 126.2, 123.0, 122.7, 121.7, 120.4, 114.0, 21.4; HRMS (ESI)  $m/z$ :  $[\text{M}+\text{H}]^+$  Calcd for  $\text{C}_{15}\text{H}_{11}\text{Cl}_2\text{N}_2\text{O}_2^+$  321.0192; Found 321.0188.

### 6-(dichloro(nitro)methyl)-3-isopropylphenanthridine (2d)

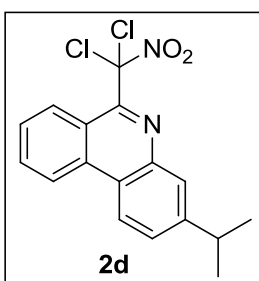

Purified by column chromatography (petroleum ether/EtOAc = 5/1 (V/V)) as a yellow solid (74.5 mg, 71%), m.p. 107–108 °C.  $^1\text{H}$  NMR (500 MHz,  $\text{CDCl}_3$ ):  $\delta$  8.70 (d,  $J = 8.5$  Hz, 1H), 8.58 (d,  $J = 8.5$  Hz, 1H), 8.51 (d,  $J = 8.5$  Hz, 1H), 8.01 (d,  $J = 1.5$  Hz, 1H), 7.92–7.89 (m, 1H), 7.76–7.72 (m, 1H), 7.69 (dd,  $J_1 = 8.5$  Hz,  $J_2 = 2.0$  Hz, 1H), 3.21–3.13 (m, 1H), 1.39 (t,  $J = 6.5$  Hz, 6H);  $^{13}\text{C}$  NMR (125 MHz,  $\text{CDCl}_3$ ):  $\delta$  150.8, 149.8, 141.1, 134.7, 131.2, 129.1, 128.1, 127.1, 126.2, 123.1, 123.0, 121.9, 120.5, 114.0, 34.1, 23.8; HRMS (ESI)  $m/z$ :  $[\text{M}+\text{H}]^+$  Calcd for  $\text{C}_{17}\text{H}_{15}\text{Cl}_2\text{N}_2\text{O}_2^+$  349.0505; Found 349.0512.

### 3-tert-butyl-6-(dichloro(nitro)methyl)phenanthridine (2e)

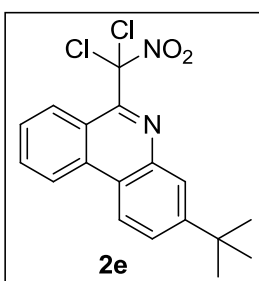

Purified by column chromatography (petroleum ether/EtOAc =

5/1 (V/V)) as a yellow solid (65.3 mg, 60%), m.p. 145–146 °C.  $^1\text{H NMR}$  (500 MHz,  $\text{CDCl}_3$ ):  $\delta$  8.71 (d,  $J = 8.5$  Hz, 1H), 8.58 (d,  $J = 8.5$  Hz, 1H), 8.53 (d,  $J = 9.0$  Hz, 1H), 8.14 (d,  $J = 2.5$  Hz, 1H), 7.93–7.87 (m, 2H), 7.76–7.73 (m, 1H), 1.47 (s, 9H);  $^{13}\text{C NMR}$  (125 MHz,  $\text{CDCl}_3$ ):  $\delta$  153.2, 149.8, 140.9, 134.6, 131.1, 127.9, 127.14, 127.12, 126.2, 123.0, 122.7, 121.7, 120.6, 114.0, 35.1, 31.2; **HRMS** (ESI)  $m/z$ :  $[\text{M}+\text{H}]^+$  Calcd for  $\text{C}_{18}\text{H}_{17}\text{Cl}_2\text{N}_2\text{O}_2^+$  363.0662; Found 363.0668.

### 3-bromo-6-(dichloro(nitro)methyl)phenanthridine (2f)

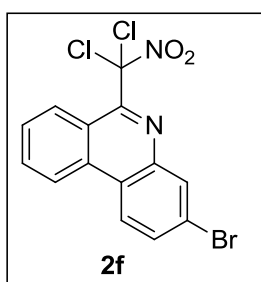

Purified by column chromatography (petroleum ether/EtOAc = 5/1 (V/V)) as a yellow solid (59.0 mg, 51%), m.p. 167–169 °C.  $^1\text{H NMR}$  (500 MHz,  $\text{CDCl}_3$ ):  $\delta$  8.64 (d,  $J = 8.5$  Hz, 1H), 8.57 (d,  $J = 8.5$  Hz, 1H), 8.49 (d,  $J = 8.5$  Hz, 1H), 8.32 (d,  $J = 2.0$  Hz, 1H), 7.94–7.90 (m, 1H), 7.83 (dd,  $J_1 = 9.0$  Hz,  $J_2 = 2.0$  Hz, 1H), 7.79–7.76 (m, 1H);  $^{13}\text{C NMR}$  (125 MHz,  $\text{CDCl}_3$ ):  $\delta$  151.0, 141.6, 134.3, 133.6, 132.7, 131.7, 127.9, 126.4, 123.8, 123.4, 123.3, 123.1, 120.8, 113.6; **HRMS** (ESI)  $m/z$ :  $[\text{M}+\text{H}]^+$  Calcd for  $\text{C}_{14}\text{H}_8\text{BrCl}_2\text{N}_2\text{O}_2^+$  384.9141; Found 384.9148.

### 3-bromo-6-(chloro(nitro)methyl)phenanthridine (2f')

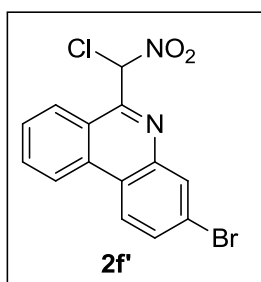

Purified by column chromatography (petroleum ether/EtOAc = 5/1 (V/V)) as a yellow solid (33.7 mg, 32%);  $^1\text{H NMR}$  (500 MHz,  $\text{CDCl}_3$ ):  $\delta$  8.86 (d,  $J = 8.5$  Hz, 1H), 8.66 (d,  $J = 8.5$  Hz, 1H), 8.44 (d,  $J = 9.0$  Hz, 1H), 8.35 (d,  $J = 2.0$  Hz, 1H), 7.84–7.82 (m, 3H), 7.28 (s, 1H);  $^{13}\text{C NMR}$  (125 MHz,  $\text{CDCl}_3$ ):  $\delta$  155.8, 143.0, 134.0, 133.0, 131.6, 131.5, 127.6, 127.2, 123.8, 123.5, 122.9, 122.7, 121.8, 72.1; **HRMS** (ESI)  $m/z$ :  $[\text{M}+\text{H}]^+$  Calcd for  $\text{C}_{14}\text{H}_9\text{BrClN}_2\text{O}_2^+$  350.9530; Found 350.9536.

### 3-chloro-6-(dichloro(nitro)methyl)phenanthridine (2g)

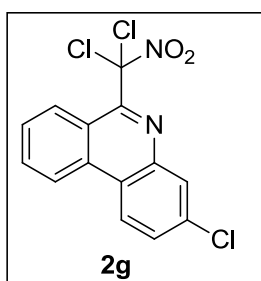

Purified by column chromatography (petroleum ether/EtOAc =

5/1 (V/V)) as a yellow solid (48.2 mg, 47%), m.p. 132–133 °C. **<sup>1</sup>H NMR** (500 MHz, CDCl<sub>3</sub>): δ 8.63 (d, *J* = 8.5 Hz, 1H), 8.59 (d, *J* = 8.5 Hz, 1H), 8.46 (d, *J* = 9.0 Hz, 1H), 8.14 (d, *J* = 2.0 Hz, 1H), 7.95–7.92 (m, 1H), 7.80–7.77 (m, 1H), 7.70 (dd, *J*<sub>1</sub> = 9.0 Hz, *J*<sub>2</sub> = 2.5 Hz, 1H); **<sup>13</sup>C NMR** (125 MHz, CDCl<sub>3</sub>): δ 151.1, 141.3, 135.3, 134.2, 131.7, 130.3, 130.0, 127.9, 126.4, 123.4, 123.3, 123.1, 120.7, 113.6; **HRMS** (ESI) *m/z*: [M+H]<sup>+</sup> Calcd for C<sub>14</sub>H<sub>8</sub>Cl<sub>3</sub>N<sub>2</sub>O<sub>2</sub><sup>+</sup> 340.9646; Found 340.9641.

#### 6-(dichloro(nitro)methyl)-3-(trifluoromethoxy)phenanthridine (2h)

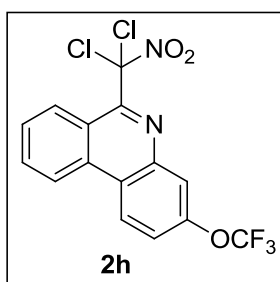

Purified by column chromatography (petroleum ether/EtOAc = 5/1 (V/V)) as a yellow solid (76.2 mg, 65%), m.p. 129–130 °C. **<sup>1</sup>H NMR** (500 MHz, CDCl<sub>3</sub>): δ 8.71 (d, *J* = 8.0 Hz, 1H), 8.64–8.60 (m, 2H), 8.46 (d, *J* = 9.0 Hz, 1H), 8.04–8.03 (m, 1H), 7.99–7.97 (m, 1H), 7.84–7.81 (m, 1H), 7.67–7.64 (m, 1H); **<sup>13</sup>C NMR** (125 MHz, CDCl<sub>3</sub>): δ 151.4, 149.64, 149.63, 141.5, 134.2, 131.8, 128.0, 126.4, 123.9, 123.5, 123.2, 122.8, 121.6, 120.5 (q, *J* = 256.3 Hz), 113.5; **<sup>19</sup>F NMR** (470 MHz, CDCl<sub>3</sub>): δ -57.72; **HRMS** (ESI) *m/z*: [M+H]<sup>+</sup> Calcd for C<sub>15</sub>H<sub>8</sub>Cl<sub>2</sub>F<sub>3</sub>N<sub>2</sub>O<sub>3</sub><sup>+</sup> 390.9859; Found 390.9852.

#### 6-(dichloro(nitro)methyl)phenanthridine-4-carbonitrile (2i)

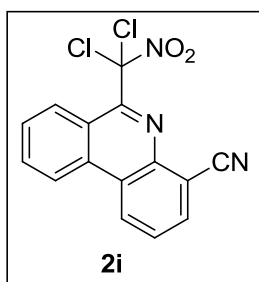

Purified by column chromatography (petroleum ether/EtOAc = 5/1 (V/V)) as a yellow solid (67.6 mg, 70%), m.p. 198–200 °C. **<sup>1</sup>H NMR** (500 MHz, CDCl<sub>3</sub>): δ 8.94 (d, *J* = 1.5 Hz, 1H), 8.73 (d, *J* = 8.5 Hz, 1H), 8.66 (d, *J* = 8.0 Hz, 1H), 8.27 (d, *J* = 8.5 Hz, 1H), 8.07–8.04 (m, 1H), 7.98 (dd, *J*<sub>1</sub> = 8.5 Hz, *J*<sub>2</sub> = 1.5 Hz, 1H), 7.92–7.88 (m, 1H); **<sup>13</sup>C NMR** (125 MHz, CDCl<sub>3</sub>): δ 152.8, 142.4, 133.7, 132.5, 134.0, 128.9, 127.7, 126.7, 125.2, 123.2, 121.2, 118.4, 113.3, 113.0; **HRMS** (ESI) *m/z*: [M+H]<sup>+</sup> Calcd for C<sub>15</sub>H<sub>8</sub>Cl<sub>2</sub>N<sub>3</sub>O<sub>2</sub><sup>+</sup> 331.9988; Found 331.9983.

#### 6-(dichloro(nitro)methyl)-4-methoxyphenanthridine (2j)

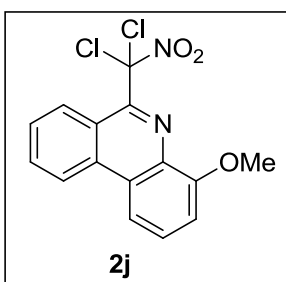

Purified by column chromatography (petroleum ether/EtOAC = 5/1 (V/V)) as a yellow solid (63.7 mg, 63%), m.p. 126–128 °C. **<sup>1</sup>H NMR** (500 MHz, CDCl<sub>3</sub>): δ 8.66 (d, *J* = 8.5 Hz, 1H), 8.58 (d, *J* = 8.5 Hz, 1H), 8.09 (d, *J* = 9.0 Hz, 1H), 7.93–7.90 (m, 2H), 7.80–7.76 (m, 1H), 7.42 (dd, *J*<sub>1</sub> = 9.0 Hz, *J*<sub>2</sub> = 2.0 Hz, 1H), 4.06 (s, 3H); **<sup>13</sup>C NMR** (125 MHz, CDCl<sub>3</sub>): δ 160.5, 147.3, 136.1, 134.0, 132.9, 130.7, 127.6, 126.5, 126.2, 123.2, 121.0, 119.5, 114.2, 102.8, 55.8; **HRMS** (ESI) *m/z*: [M+H]<sup>+</sup> Calcd for C<sub>15</sub>H<sub>11</sub>Cl<sub>2</sub>N<sub>2</sub>O<sub>3</sub><sup>+</sup> 337.0141; Found 337.0145.

### 6-(dichloro(nitro)methyl)-2,4-dimethylphenanthridine (2k)

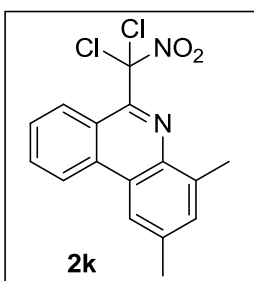

Purified by column chromatography (petroleum ether/EtOAC = 5/1 (V/V)) as a yellow solid (83.4 mg, 83%), m.p. 161–162 °C. **<sup>1</sup>H NMR** (500 MHz, CDCl<sub>3</sub>): δ 8.68 (d, *J* = 8.5 Hz, 1H), 8.63 (d, *J* = 8.5 Hz, 1H), 8.17 (s, 1H), 7.89–7.86 (m, 1H), 7.76–7.73 (m, 1H), 7.45 (s, 1H), 2.71 (s, 3H), 2.58 (s, 3H); **<sup>13</sup>C NMR** (125 MHz, CDCl<sub>3</sub>): δ 147.6, 139.5, 139.1, 137.7, 134.6, 131.9, 130.74, 127.2, 126.1, 124.9, 123.3, 120.5, 119.3, 114.3, 22.2, 17.6; **HRMS** (ESI) *m/z*: [M+H]<sup>+</sup> Calcd for C<sub>16</sub>H<sub>13</sub>Cl<sub>2</sub>N<sub>2</sub>O<sub>2</sub><sup>+</sup> 335.0349; Found 335.0356.

### 1-chloro-6-(dichloro(nitro)methyl)phenanthridine (2l)

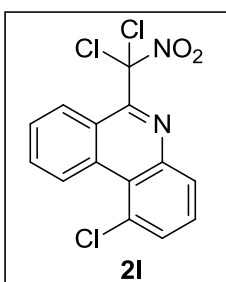

Purified by column chromatography (petroleum ether/EtOAC = 5/1 (V/V)) as a yellow solid (58.4 mg, 57%), m.p. 120–121 °C. **<sup>1</sup>H NMR** (500 MHz, CDCl<sub>3</sub>): δ 10.03 (d, *J* = 9.0 Hz, 1H), 8.65 (dd, *J*<sub>1</sub> = 8.5 Hz, *J*<sub>2</sub> = 1.0 Hz, 1H), 8.14–8.13 (dd, *J*<sub>1</sub> = 8.5 Hz, *J*<sub>2</sub> = 1.5 Hz, 1H), 7.98–7.95 (m, 1H), 7.89–7.83 (m, 2H), 7.70–7.67 (t, *J* = 8.0 Hz, 1H); **<sup>13</sup>C NMR** (125 MHz, CDCl<sub>3</sub>): δ 150.6, 142.0, 134.0, 133.4, 131.2, 130.8, 130.5, 128.7, 127.8, 127.3, 126.0, 122.7, 121.5, 113.7; **HRMS** (ESI) *m/z*: [M+H]<sup>+</sup> Calcd for C<sub>14</sub>H<sub>8</sub>Cl<sub>3</sub>N<sub>2</sub>O<sub>2</sub><sup>+</sup>

340.9646; Found 340.9642.

### 6-(dichloro(nitro)methyl)-1-methylphenanthridine (2m)

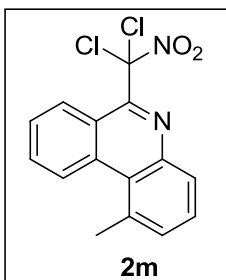

Purified by column chromatography (petroleum ether/EtOAc = 5/1 (V/V)) as a yellow solid (62.6 mg, 65%), m.p. 152–153 °C. **<sup>1</sup>H NMR** (500 MHz, CDCl<sub>3</sub>): δ 8.99 (d, *J* = 8.5 Hz, 1H), 8.65 (dd, *J*<sub>1</sub> = 8.5 Hz, *J*<sub>2</sub> = 0.5 Hz, 1H), 8.07 (dd, *J*<sub>1</sub> = 8.5 Hz, *J*<sub>2</sub> = 1.0 Hz, 1H), 7.94–7.90 (m, 1H), 7.80–7.77 (m, 1H), 7.69–7.62 (m, 2H), 3.13 (s, 3H); **<sup>13</sup>C NMR** (125 MHz, CDCl<sub>3</sub>): δ 149.5, 142.3, 135.9, 134.9, 133.8, 130.3, 130.3, 128.6, 127.5, 126.7, 126.1, 124.8, 121.6, 114.0, 26.6; **HRMS** (ESI) *m/z*: [M+H]<sup>+</sup> Calcd for C<sub>15</sub>H<sub>11</sub>Cl<sub>2</sub>N<sub>2</sub>O<sub>2</sub><sup>+</sup> 321.0192; Found 321.0185.

### 6-(dichloro(nitro)methyl)benzo[*c*]phenanthridine (2n)

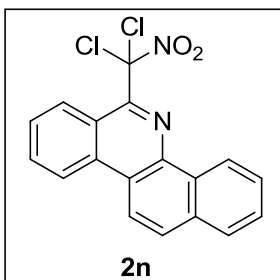

Purified by column chromatography (petroleum ether/EtOAc = 5/1 (V/V)) as a yellow solid (85.7 mg, 80%), m.p. 168–169 °C. **<sup>1</sup>H NMR** (500 MHz, CDCl<sub>3</sub>): 9.15 (d, *J* = 8.5 Hz, 1H), 8.82 (d, *J* = 8.5 Hz, 1H), 8.73 (d, *J* = 8.5 Hz, 1H), 8.55 (d, *J* = 9.0 Hz, 1H), 8.15 (d, *J* = 8.5 Hz, 1H), 8.00–7.97 (m, 2H), 7.85–7.78 (m, 2H), 7.75–7.71 (m, 1H); **<sup>13</sup>C NMR** (125 MHz, CDCl<sub>3</sub>): δ 148.6, 137.9, 134.9, 133.4, 131.8, 131.1, 130.6, 128.16, 128.0, 127.7, 127.5, 126.1, 124.9, 123.6, 122.9, 121.4, 119.2, 114.2; **HRMS** (ESI) *m/z*: [M+H]<sup>+</sup> Calcd for C<sub>18</sub>H<sub>11</sub>Cl<sub>2</sub>N<sub>2</sub>O<sub>2</sub><sup>+</sup> 357.0192; Found 357.0187.

### 6-(dichloro(nitro)methyl)-8-fluorophenanthridine (2o)

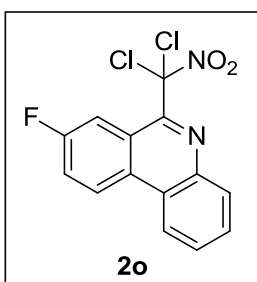

Purified by column chromatography (petroleum ether/EtOAc = 5/1 (V/V)) as a yellow solid (70.2 mg, 72%), m.p. 181–182 °C. **<sup>1</sup>H NMR** (500 MHz, CDCl<sub>3</sub>): δ 8.74 (dd, *J*<sub>1</sub> = 9.5 Hz, *J*<sub>2</sub> = 5.0 Hz, 1H), 8.54–8.52 (m, 1H), 8.28 (dd, *J*<sub>1</sub> = 8.5 Hz, *J*<sub>2</sub> = 2.0 Hz, 1H), 8.17–8.15 (m, 1H), 7.82–7.77 (m, 2H), 7.72–7.68 (m, 1H); **<sup>13</sup>C NMR** (125 MHz, CDCl<sub>3</sub>):



$\delta$  160.8 (d,  $J = 248.8$  Hz), 149.1 (d,  $J = 3.0$  Hz), 140.5, 131.5, 131.4 (d,  $J = 2.5$  Hz), 130.0, 129.4, 125.8 (d,  $J = 8.8$  Hz), 124.6, 122.9 (d,  $J = 8.8$  Hz), 121.7, 120.8 (d,  $J = 23.8$  Hz), 113.6, 111.4 (d,  $J = 23.8$  Hz);  $^{19}\text{F}$  NMR (470 MHz,  $\text{CDCl}_3$ ):  $\delta$  -109.15; HRMS (ESI)  $m/z$ :  $[\text{M}+\text{H}]^+$  Calcd for  $\text{C}_{14}\text{H}_8\text{Cl}_2\text{FN}_2\text{O}_2^+$  324.9941; Found 324.9946.

#### 6-(dichloro(nitro)methyl)-7-fluorophenanthridine (2p)

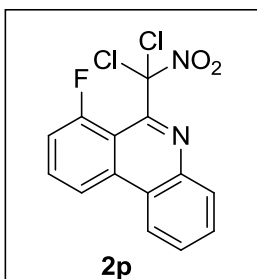

Purified by column chromatography (petroleum ether/EtOAc = 5/1 (V/V)) as a yellow solid (58.5 mg, 60%), m.p. 128–130 °C.  $^1\text{H}$  NMR (500 MHz,  $\text{CDCl}_3$ ):  $\delta$  8.57–8.54 (m, 2H), 8.29–8.28 (m, 1H), 7.90–7.80 (m, 3H), 7.44–7.40 (m, 1H);  $^{13}\text{C}$  NMR (125 MHz,  $\text{CDCl}_3$ ):  $\delta$  157.6 (d,  $J = 252.5$  Hz), 146.4 (d,  $J = 3.8$  Hz), 141.2, 136.7 (d,  $J = 2.5$  Hz), 132.1 (d,  $J = 10.0$  Hz), 131.3, 130.1, 123.9 (d,  $J = 2.5$  Hz), 122.4, 119.3 (d,  $J = 3.8$  Hz), 114.9, 114.7, 113.8, 111.6 (d,  $J = 13.8$  Hz);  $^{19}\text{F}$  NMR (470 MHz,  $\text{CDCl}_3$ ):  $\delta$  -99.15; HRMS (ESI)  $m/z$ :  $[\text{M}+\text{H}]^+$  Calcd for  $\text{C}_{14}\text{H}_8\text{Cl}_2\text{FN}_2\text{O}_2^+$  324.9941; Found 324.9943.

#### 6-(dichloro(nitro)methyl)-9-fluorophenanthridine (2q)

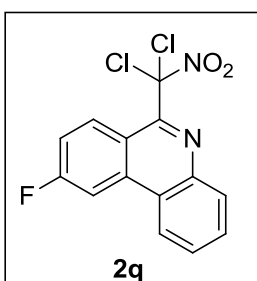

Purified by column chromatography (petroleum ether/EtOAc = 5/1 (V/V)) as a yellow solid (61.4 mg, 63%), m.p. 170–171 °C.  $^1\text{H}$  NMR (500 MHz,  $\text{CDCl}_3$ ):  $\delta$  8.67 (dd,  $J_1 = 9.0$  Hz,  $J_2 = 5.0$  Hz, 1H), 8.48–8.47 (m, 1H), 8.48 (dd,  $J_1 = 10.0$  Hz,  $J_2 = 2.5$  Hz, 1H), 8.18–8.16 (m, 1H), 7.85–7.79 (m, 2H), 7.55–7.51 (m, 1H);  $^{13}\text{C}$  NMR (125 MHz,  $\text{CDCl}_3$ ):  $\delta$  163.9 (d,  $J = 252.5$  Hz), 149.6, 141.0, 137.5, 131.4, 130.2, 129.6, 129.4 (d,  $J = 8.8$  Hz), 124.6 (d,  $J = 2.5$  Hz), 122.1, 117.7, 116.9 (d,  $J = 23.8$  Hz), 113.7, 108.4 (d,  $J = 22.5$  Hz);  $^{19}\text{F}$  NMR (470 MHz,  $\text{CDCl}_3$ ):  $\delta$  -104.50; HRMS (ESI)  $m/z$ :  $[\text{M}+\text{H}]^+$  Calcd for  $\text{C}_{14}\text{H}_8\text{Cl}_2\text{FN}_2\text{O}_2^+$  324.9941; Found 324.9938.

#### 6-(dichloro(nitro)methyl)-9-fluoro-3-methylphenanthridine (2r)

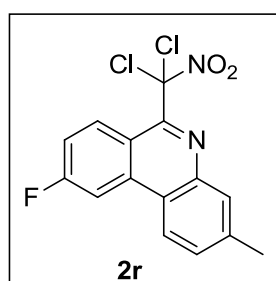

Purified by column chromatography (petroleum ether/EtOAc = 5/1 (V/V)) as a yellow solid (80.3 mg, 79%), m.p. 151–152 °C. **<sup>1</sup>H NMR** (500 MHz, CDCl<sub>3</sub>): δ 8.66 (d, *J*<sub>1</sub> = 9.0 Hz, *J*<sub>2</sub> = 5.0 Hz, 1H), 8.37 (d, *J* = 8.5 Hz, 1H), 8.25 (d, *J*<sub>1</sub> = 7.5 Hz, *J*<sub>2</sub> = 2.5 Hz, 1H), 7.93 (s, 1H), 7.67–7.59 (m, 2H), 2.57 (s, 3H); **<sup>13</sup>C NMR** (125 MHz, CDCl<sub>3</sub>): δ 160.5 (d, *J* = 247.5 Hz), 149.0 (d, *J* = 4.3 Hz), 140.6, 139.9, 131.7, 131.5 (d, *J* = 2.5 Hz), 130.8, 125.6 (d, *J* = 8.8 Hz), 122.3, 121.6 (d, *J* = 8.8 Hz), 121.4, 120.7 (d, *J* = 23.8 Hz), 113.7, 111.2 (d, *J* = 23.8 Hz), 21.3; **<sup>19</sup>F NMR** (470 MHz, CDCl<sub>3</sub>): δ -109.95; **HRMS** (ESI) *m/z*: [M+H]<sup>+</sup> Calcd for C<sub>15</sub>H<sub>10</sub>Cl<sub>2</sub>FN<sub>2</sub>O<sub>2</sub><sup>+</sup> 339.0098; Found 339.0095.

#### 4-(dichloro(nitro)methyl)-1-phenyl-3-p-tolyl-1H-pyrazolo[4,3-c]quinoline (2s)

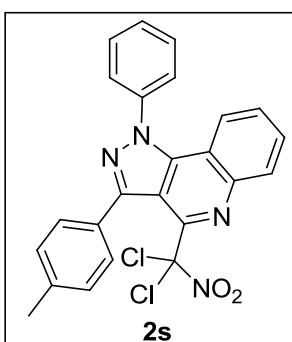

Purified by column chromatography (petroleum ether/EtOAc = 5/1 (V/V)) as a yellow solid (76.4 mg, 55%). **<sup>1</sup>H NMR** (500 MHz, CDCl<sub>3</sub>): δ 8.08–8.06 (m, 2H), 7.49–7.47 (m, 2H), 7.41–7.39 (m, 3H), 7.36–7.34 (m, 2H), 7.29–7.27 (m, 2H), 7.23–7.22 (m, 2H), 2.34 (s, 3H); **<sup>13</sup>C NMR** (125 MHz, CDCl<sub>3</sub>): δ 152.1, 149.7, 140.6, 138.7, 135.5, 129.7, 129.2, 129.1, 129.1, 128.7, 128.1, 125.3, 123.8, 115.1, 91.1, 21.4; **HRMS** (ESI) *m/z*: [M+H]<sup>+</sup> Calcd for C<sub>24</sub>H<sub>17</sub>Cl<sub>2</sub>N<sub>4</sub>O<sub>2</sub><sup>+</sup> 463.0723; Found 463.0729.

#### 2-chloro-1-(3-methyl-1,5-diphenyl-1H-pyrazol-4-yl)ethanone (2t')

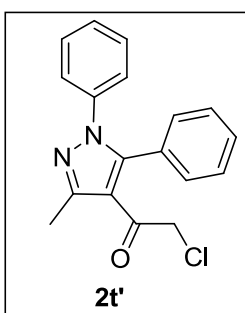

Purified by column chromatography (petroleum ether/EtOAc = 5/1 (V/V)) as a yellow solid (62.4 mg, 67%). **<sup>1</sup>H NMR** (500 MHz, CDCl<sub>3</sub>): δ 7.50 – 7.41 (m, 3H), 7.31 – 7.26 (m, 5H), 7.20 – 7.17 (m, 2H), 3.93 (s, 2H), 2.61 (s, 3H); **<sup>13</sup>C NMR** (125 MHz, CDCl<sub>3</sub>): δ 187.2, 152.2, 145.4, 138.8, 130.2, 130.1, 129.7, 129.1, 128.9, 128.1, 125.3, 118.8, 48.4, 14.5; **HRMS** (ESI) *m/z*: [M+H]<sup>+</sup> Calcd for C<sub>18</sub>H<sub>16</sub>ClN<sub>2</sub>O<sup>+</sup> 311.0946; Found 311.0940.

## 5. References

1. Y.-F. Wang, G. H. Lonca, M. L. Runigo and S. Chiba, *Org. Lett.*, 2014, **16**, 4272;
2. B. Zhou, L. Zheng, Z. Xu, H. Jin, Q. Wu, T. Li and Y. Liu, *ChemistrySelect*, 2018, **3**, 7354.

## 6. X-Ray Diffraction Analysis

The single crystals of compound **2m** were grown by slow diffusion of its hexane solution. Single-crystal X-ray diffraction data for analysis were collected at 293 K on a RAXIS-RAPID/ZJUG diffractometer with a  $\text{MoK}\alpha$  radiation ( $\lambda = 0.71073 \text{ \AA}$ ) by using an  $\omega$ - $2\theta$  scan mode. Unit-cell dimensions were obtained with least-squares refinement. Data collection and reduction were performed using the SMART and SAINT software.<sup>3</sup> All structures were solved by direct methods and refined against  $F^2$  by the full-matrix least squares techniques.<sup>4</sup> All non-hydrogen atoms were refined anisotropically. Hydrogen atoms were introduced in their calculated positions. CCDC 2348610 contains the supplementary crystallographic data for this paper. These data can be obtained free of charge via [www.ccdc.cam.ac.uk/conts/retrieving.html](http://www.ccdc.cam.ac.uk/conts/retrieving.html) (or from the Cambridge Crystallographic Data Centre, 12, Union Road, Cambridge CB2 1EZ, UK; fax: +(44) 1223 336033; or [deposit@ccdc.cam.ac.uk](mailto:deposit@ccdc.cam.ac.uk)). Details of the X-ray experiments and crystal data are summarized in Table *SI*.

3. SMART-CCD Software, version 4.05; Siemens Analytical X-ray Instruments, Madison, WI, 1996.
4. G. K. Sheldrick, SHELXS-97 and SHELXL-97, Program for X-ray Crystal Structure Refinement; University of Göttingen: Göttingen, Germany 1997.

**Table SI.** Summary of X-ray Crystallographic Data for Compound **2m** (CCDC 2348610)

*Crystal data*

$\text{C}_{15}\text{H}_{10}\text{Cl}_2\text{N}_2\text{O}_2$

$M_r = 321.15$

Orthorhombic, Pnma

Hall symbol: -P 2ac 2n

$a = 11.0880(7) \text{ \AA}$

$b = 6.8830(4) \text{ \AA}$

$c = 18.0810(9) \text{ \AA}$

$F_{000} = 656$

$D_x = 1.546 \text{ Mg m}^{-3}$

Mo  $\text{K}\alpha$  radiation

Cell parameters from 3934 reflections

$\lambda = 0.71073 \text{ \AA}$

$\theta = 3.2\text{-}27.4^\circ$

$\mu = 0.301 \text{ mm}^{-1}$

$\alpha = 90.00^\circ$   
 $\beta = 90.00^\circ$   
 $\gamma = 90.00^\circ$   
 $V = 1379.92(14) \text{ \AA}^3$

$T = 296(2) \text{ K}$   
Chunk, colourless  
0.48 x 0.28 x 0.20 mm  
 $Z = 4$

#### Data collection

RAXIS-RAPID/ZJUG diffractometer  
Detector resolution: 10.00 pixels mm<sup>-1</sup>  
 $\omega$  scans  
Absorption correction: multi-scan  
(ABSCOR; Higashi, 1995)  
 $T_{\min} = 0.7861$ ,  $T_{\max} = 0.9110$   
12881 measured reflections

1081 reflections with  $I > 2\sigma(I)$   
 $R_{\text{int}} = 0.0274$   
 $\theta_{\max} = 27.45^\circ$   
 $h = -14 \rightarrow 14$   
 $k = -8 \rightarrow 8$   
 $l = -23 \rightarrow 22$   
1701 independent reflections

#### Refinement

Refinement on  $F^2$   
 $R[F^2 > 2\sigma(F^2)] = 0.0535$   
 $wR(F^2) = 0.1242$   
 $S = 1.001$   
122 parameters  
1701 reflections  
H-atom parameters constrained

$w = 1/[\sigma^2(F_o^2) + (0.0661P)^2 + 1.2724P]$ ,  $P = (F_o^2 + 2F_c^2)/3$   
 $(\Delta/\sigma)_{\max} < 0.000$   
 $\Delta \rho_{\max} = 0.390 \text{ e \AA}^{-3}$   
 $\Delta \rho_{\min} = -0.271 \text{ e \AA}^{-3}$   
Extinction correction: Larson (1970)

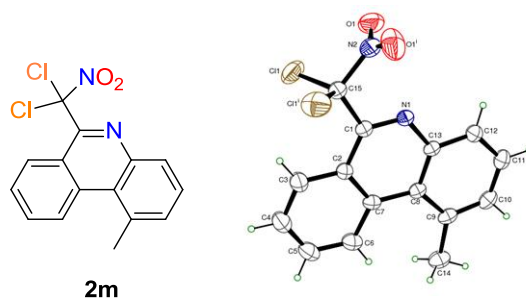

**FIGURE S1.** X-Ray crystal structure of **2m** (50% thermal ellipsoid)

## 7. <sup>1</sup>H NMR and <sup>13</sup>C NMR Spectra of All the Products

150520  
RSB-C01 CDCl<sub>3</sub>

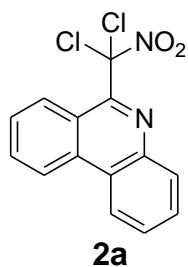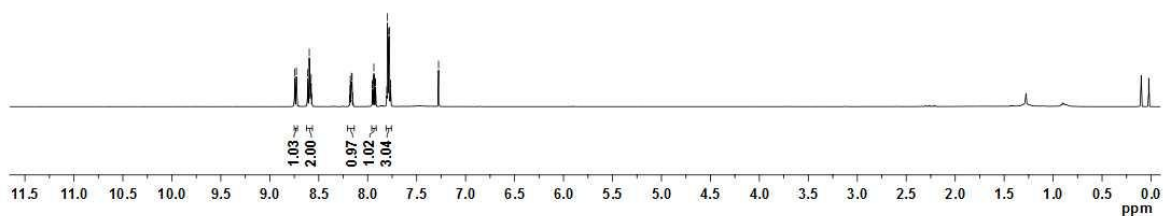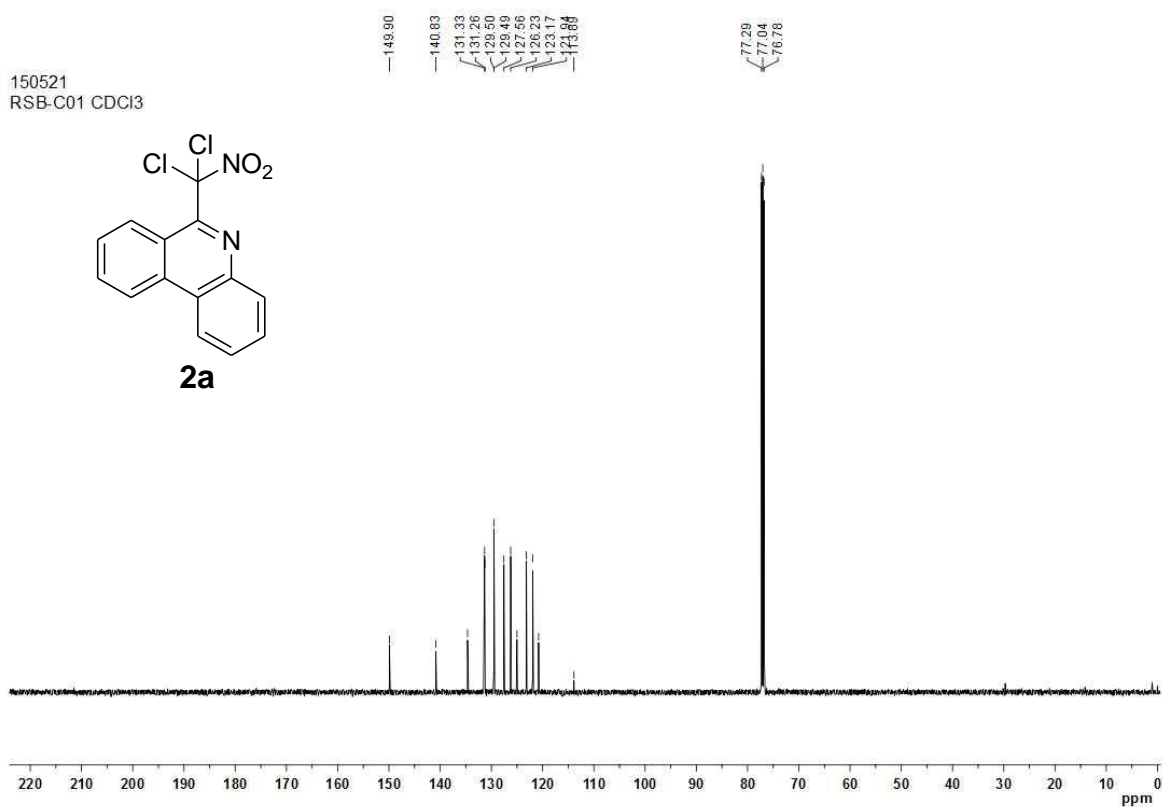

150601  
RSB-C02 CDCl3

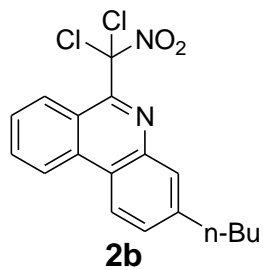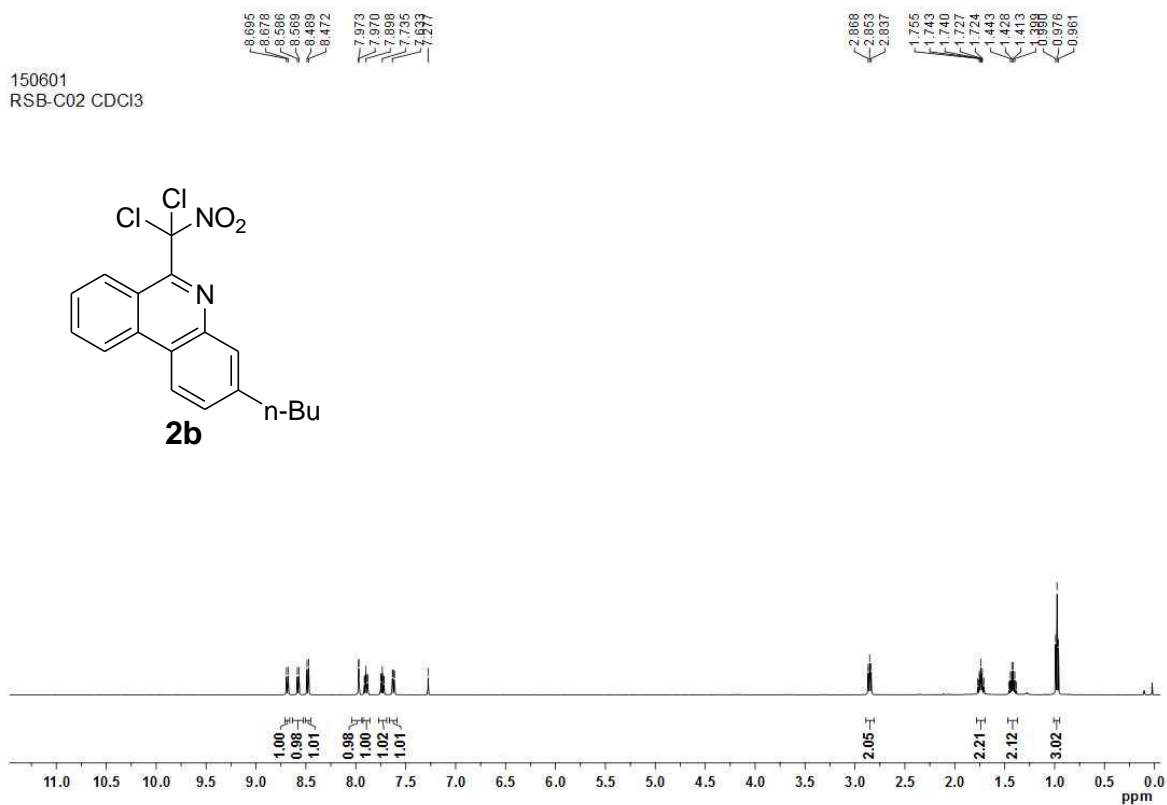

150601  
RSB-C02 CDCl3

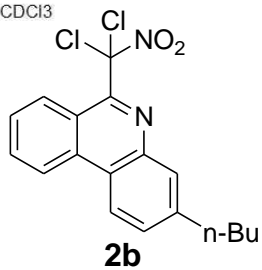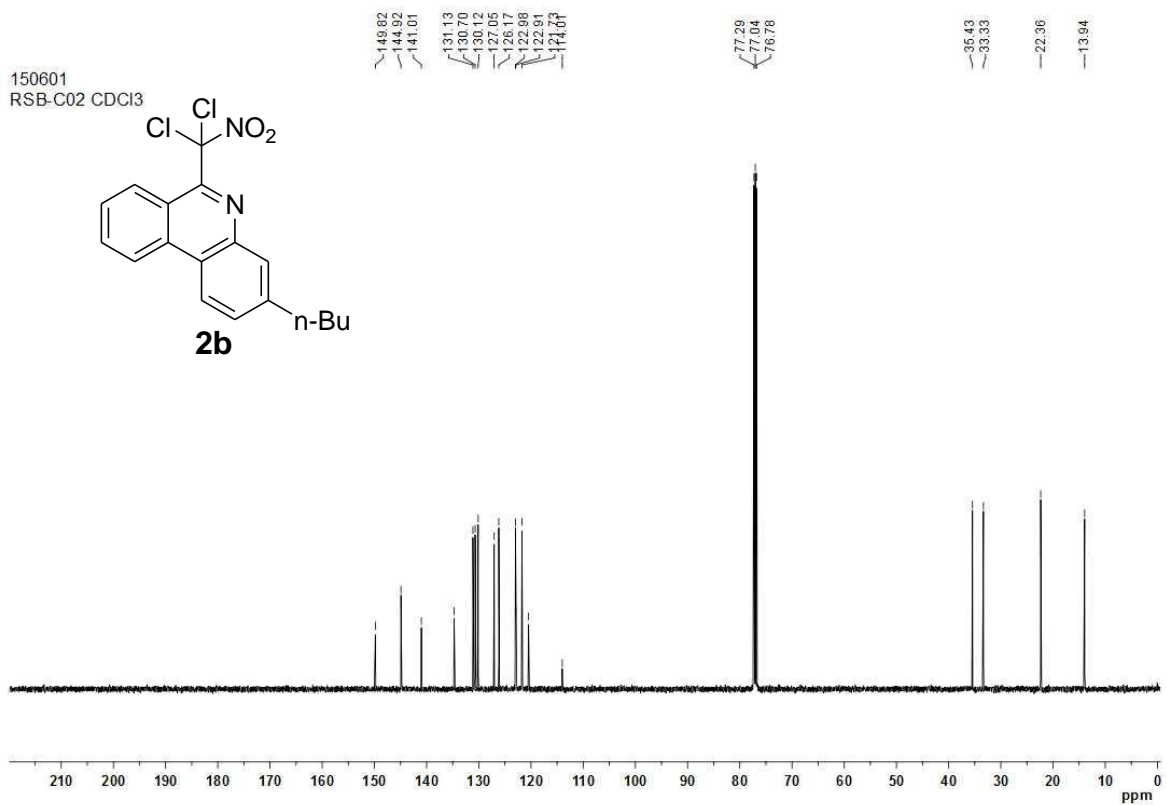

150601  
RSB-C03 CDCl3

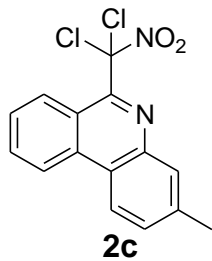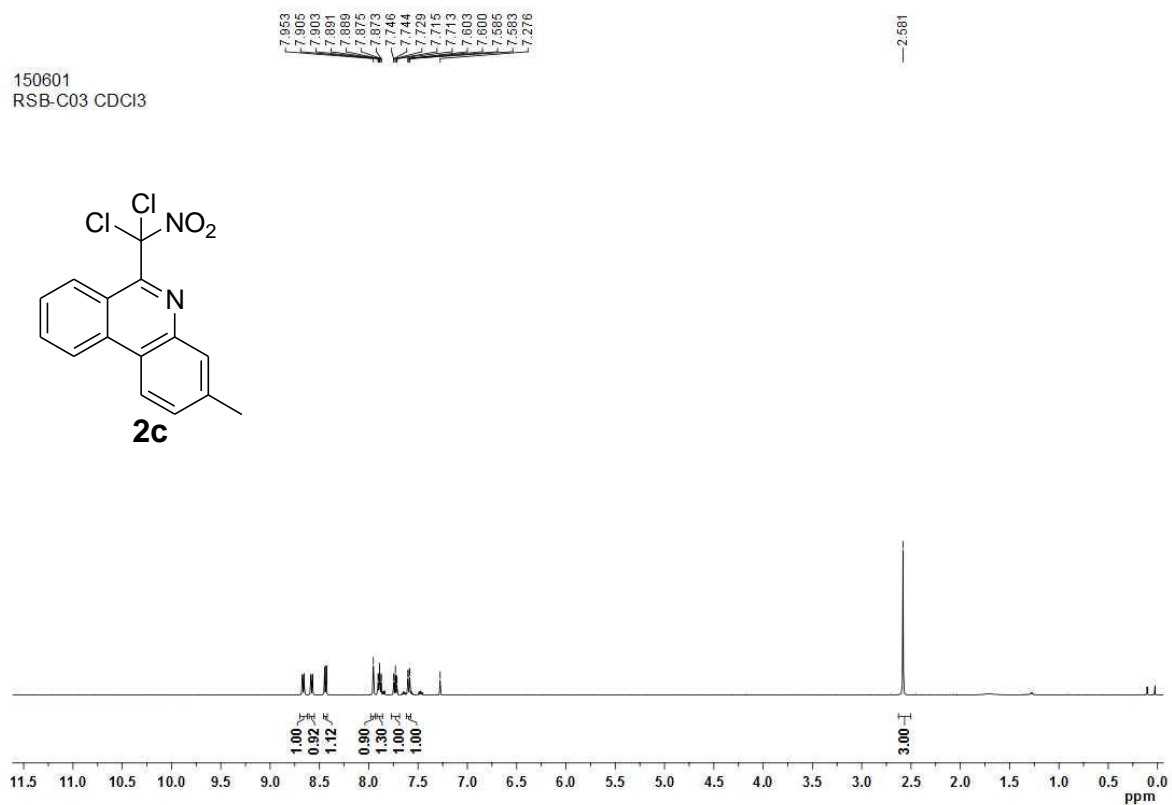

150601  
RSB-C03 CDCl3

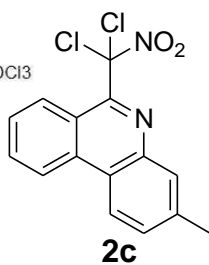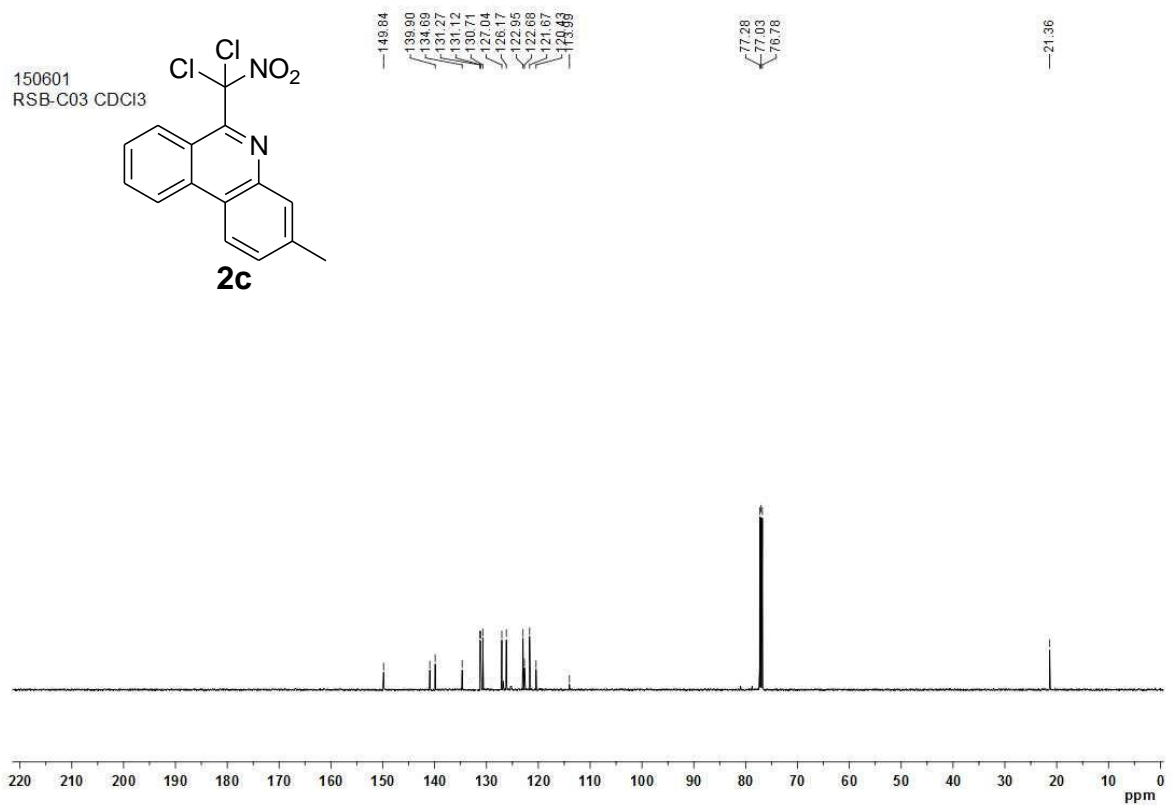

150602  
RSB-C04 CDCl3

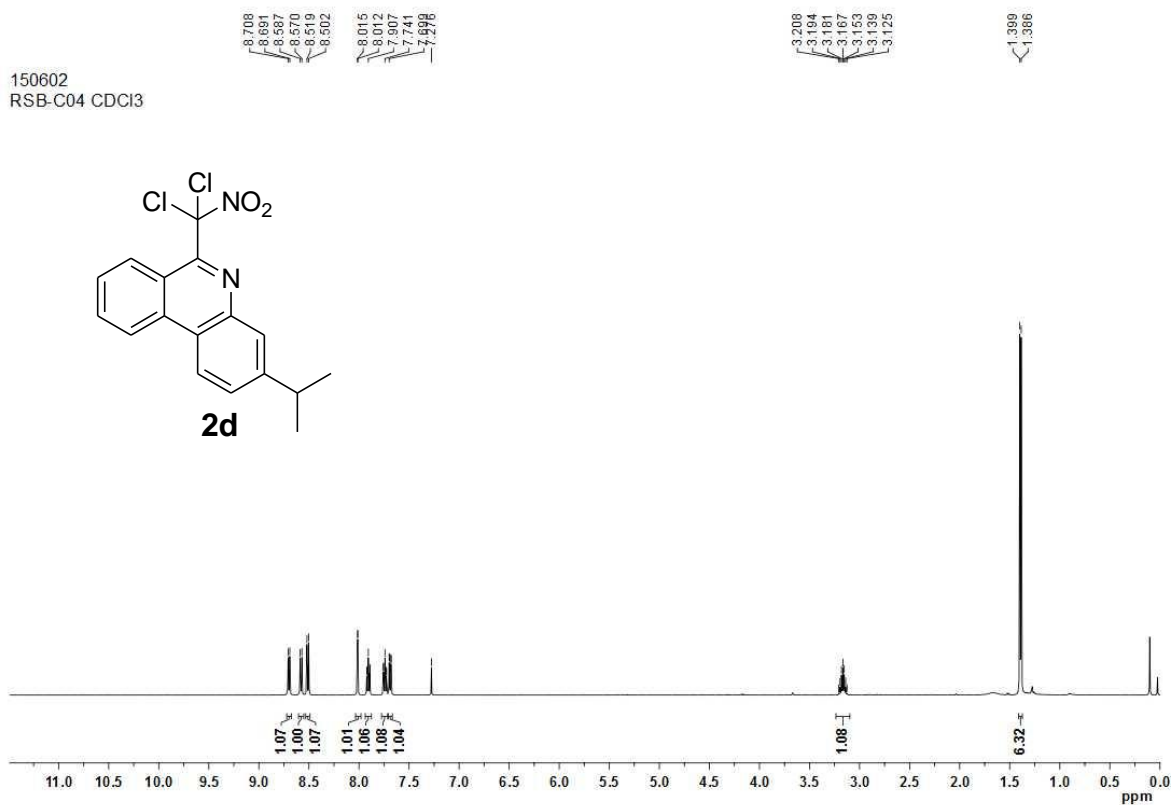

150602  
RSB-C04 CDCl3

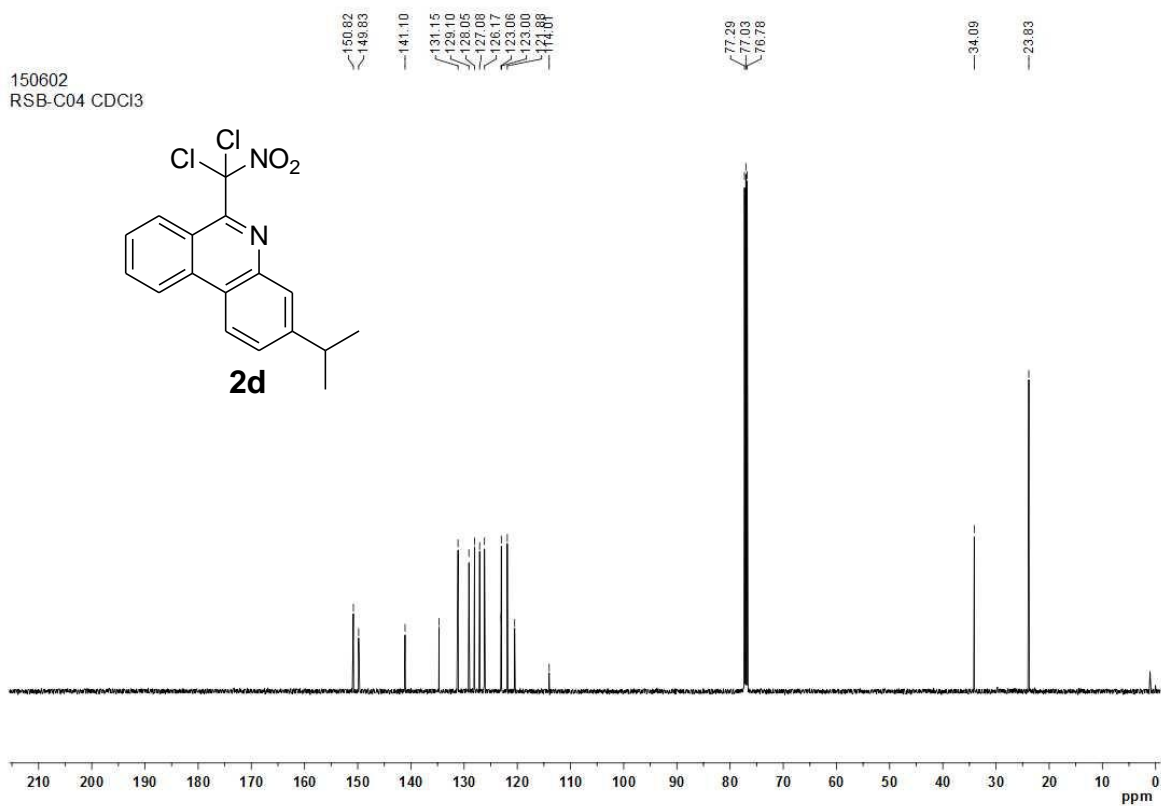



150821  
RSB-C21 CDCl<sub>3</sub>

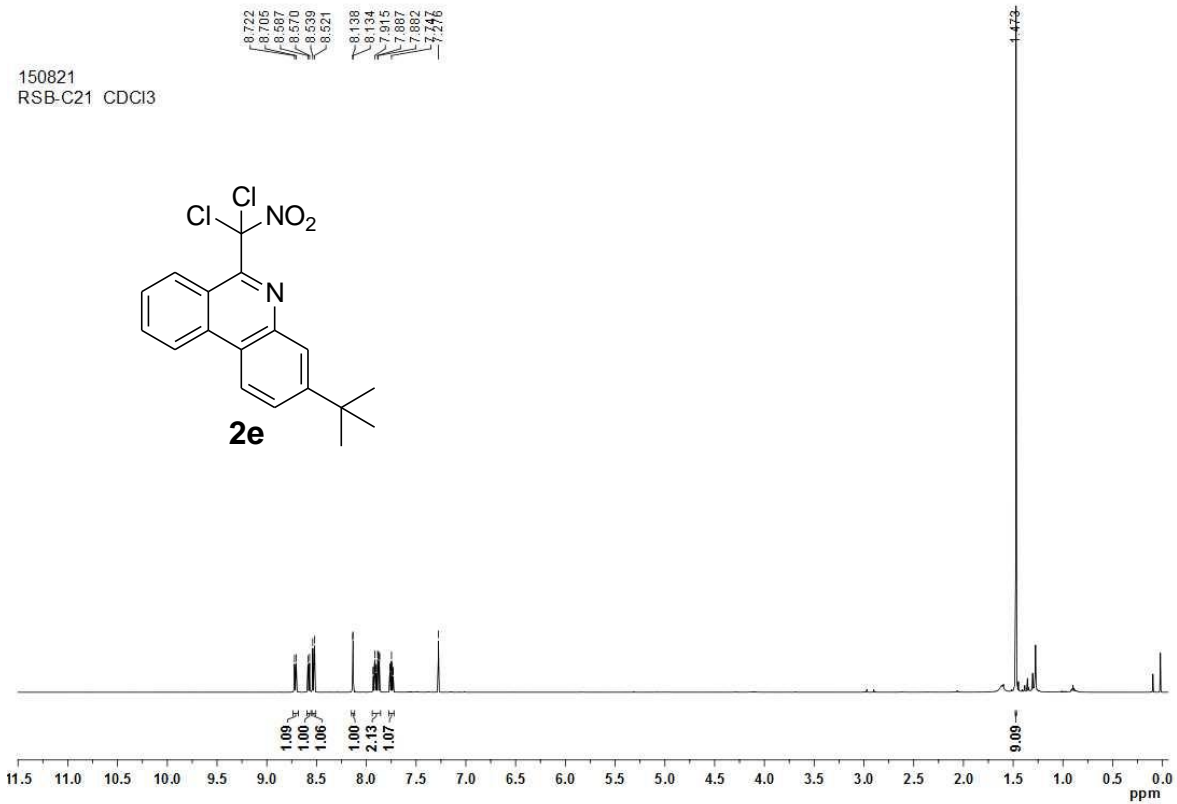

150824  
RSB-C21 CDCl<sub>3</sub>

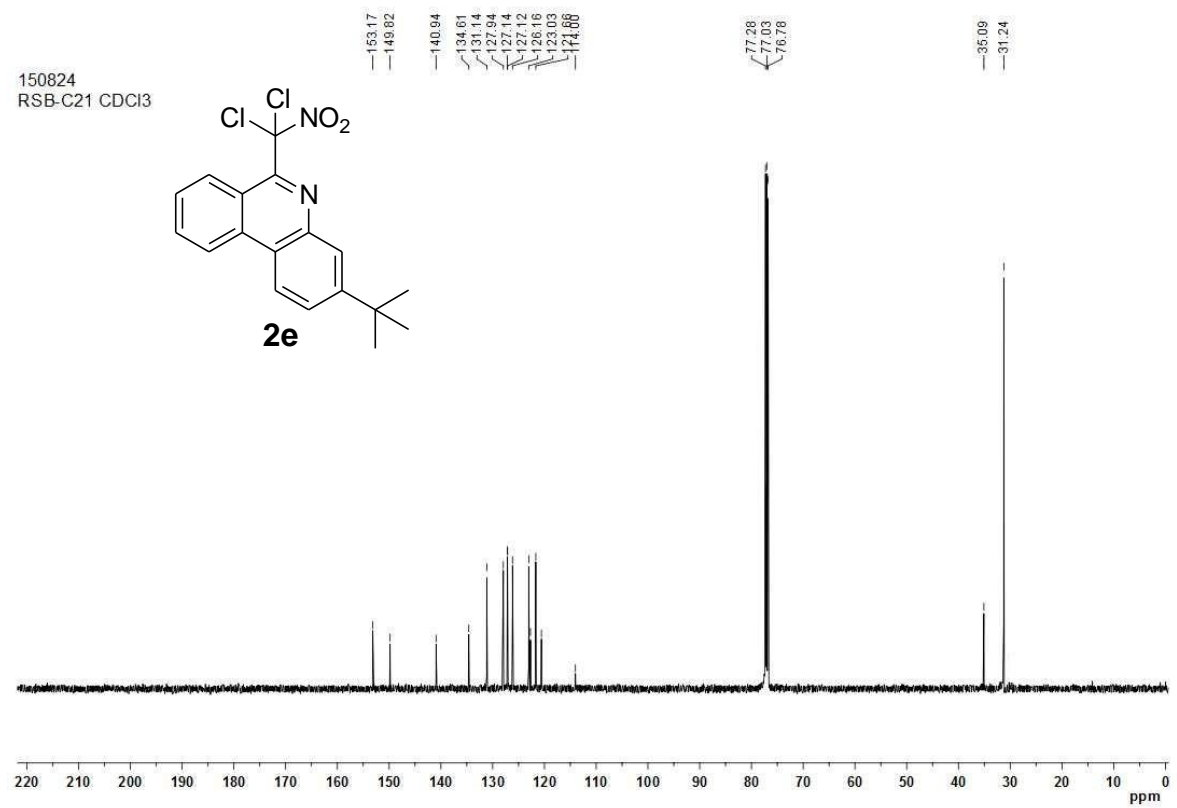

150818  
RSB-C18-2 CDCl3

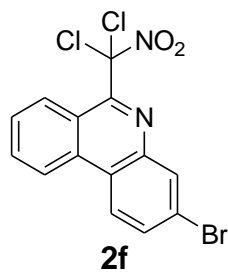

8.646  
8.629  
8.577  
8.560  
8.308  
8.381  
8.316  
8.312  
7.920  
7.842  
7.837  
7.824  
7.768

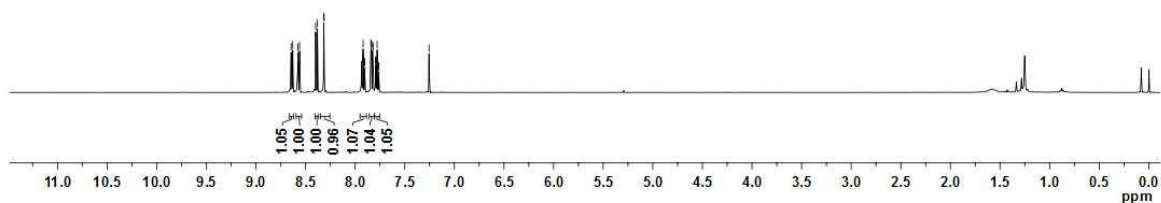

150819  
RSB-C18-2 CDCl3

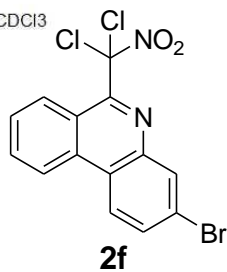

151.04  
141.59  
133.56  
132.89  
132.72  
127.68  
126.41  
123.37  
123.31  
123.08  
77.29  
77.04  
76.78

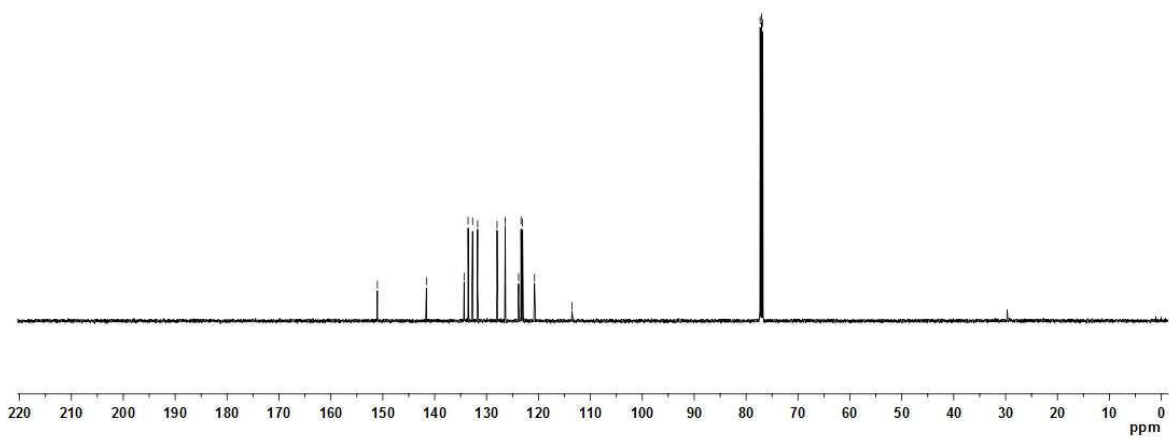

151104  
RSB-C18-11 CDCl3

8.866  
8.849  
8.666  
8.649  
8.451  
8.433  
8.352  
8.348  
7.842  
7.838  
7.825  
7.813  
7.803  
7.277

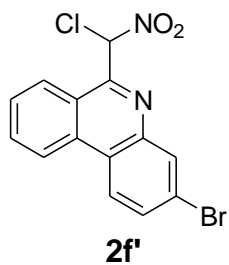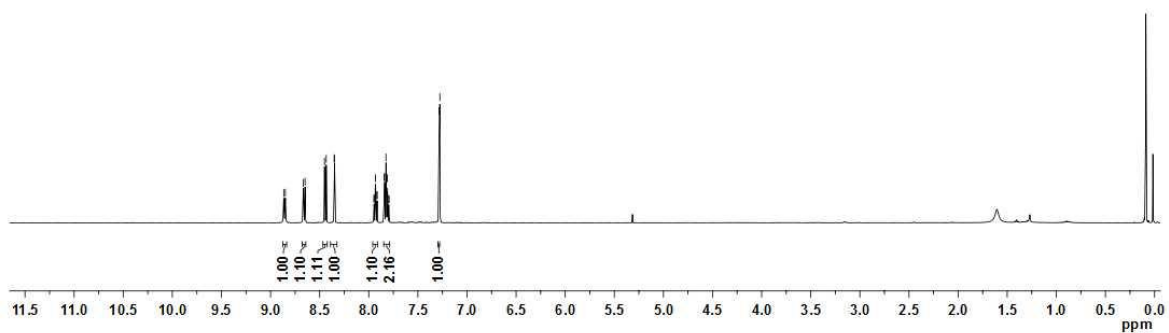

151104  
RSB-C18-11 CDCl3

151

131

121

111

101

91

81

71

61

51

41

31

21

11

1

77.29  
77.00  
76.78  
72.09

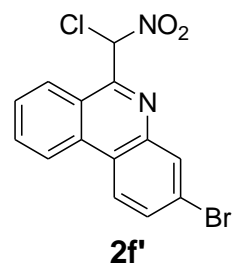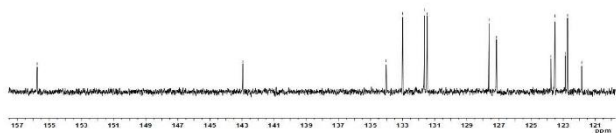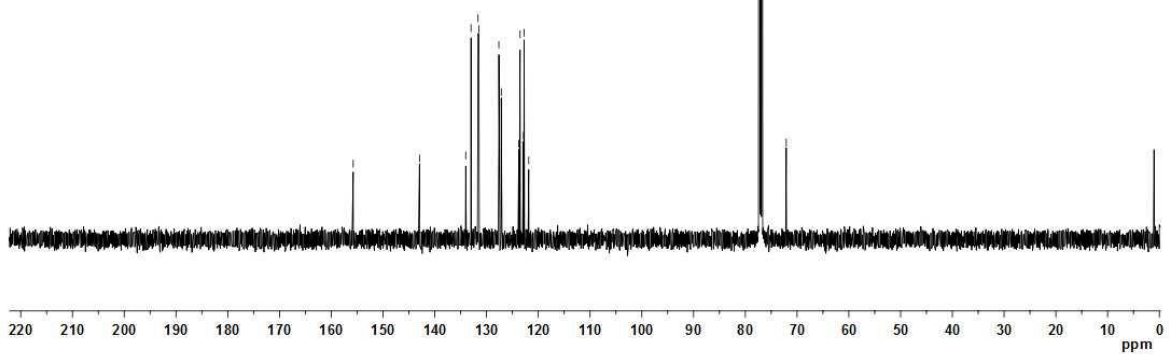

150709  
RSB-C12 CDCl3

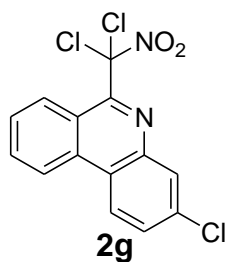

8.639  
8.622  
8.606  
8.590  
8.447  
8.139  
8.135  
7.931  
7.785  
7.708  
7.708

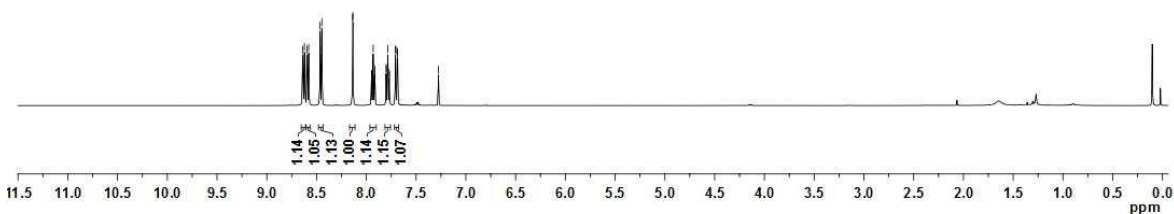

150710  
RSB-C12 CDCl3

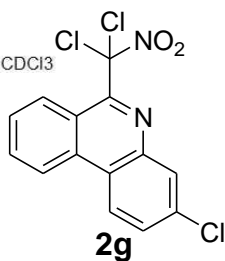

151.07  
141.34  
135.31  
131.70  
130.62  
130.60  
127.97  
126.95  
123.28  
123.08  
77.29  
77.03  
76.78

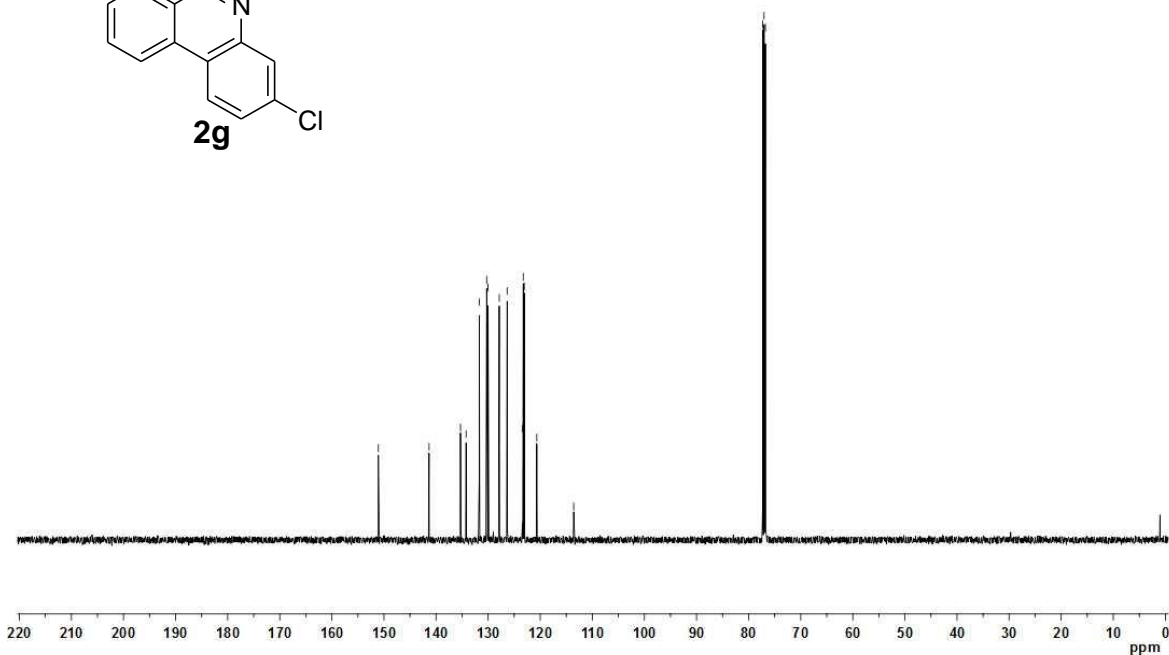

150831  
RSB-C22 CDCl3

8.718  
8.702  
8.643  
8.625  
8.619  
8.602  
8.040  
8.038  
8.035  
8.033  
7.982  
7.976

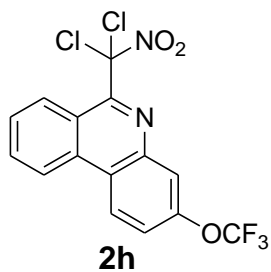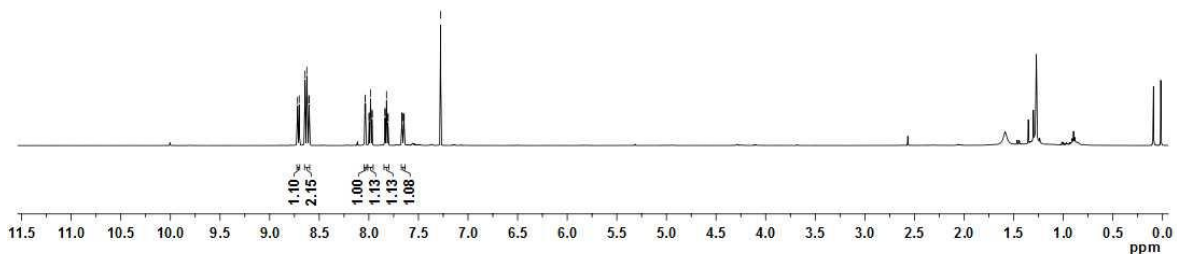

150831  
RSB-C22 CDCl3

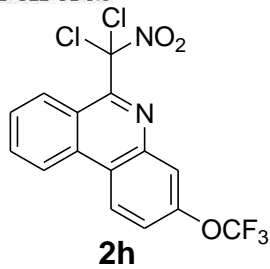

151.43  
149.64  
149.03  
141.52  
134.19  
131.81  
127.99  
126.40  
123.85  
123.16  
122.77  
121.82

77.25  
76.74

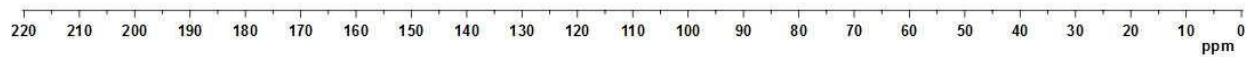

150831  
RSB-C22 CDCl3

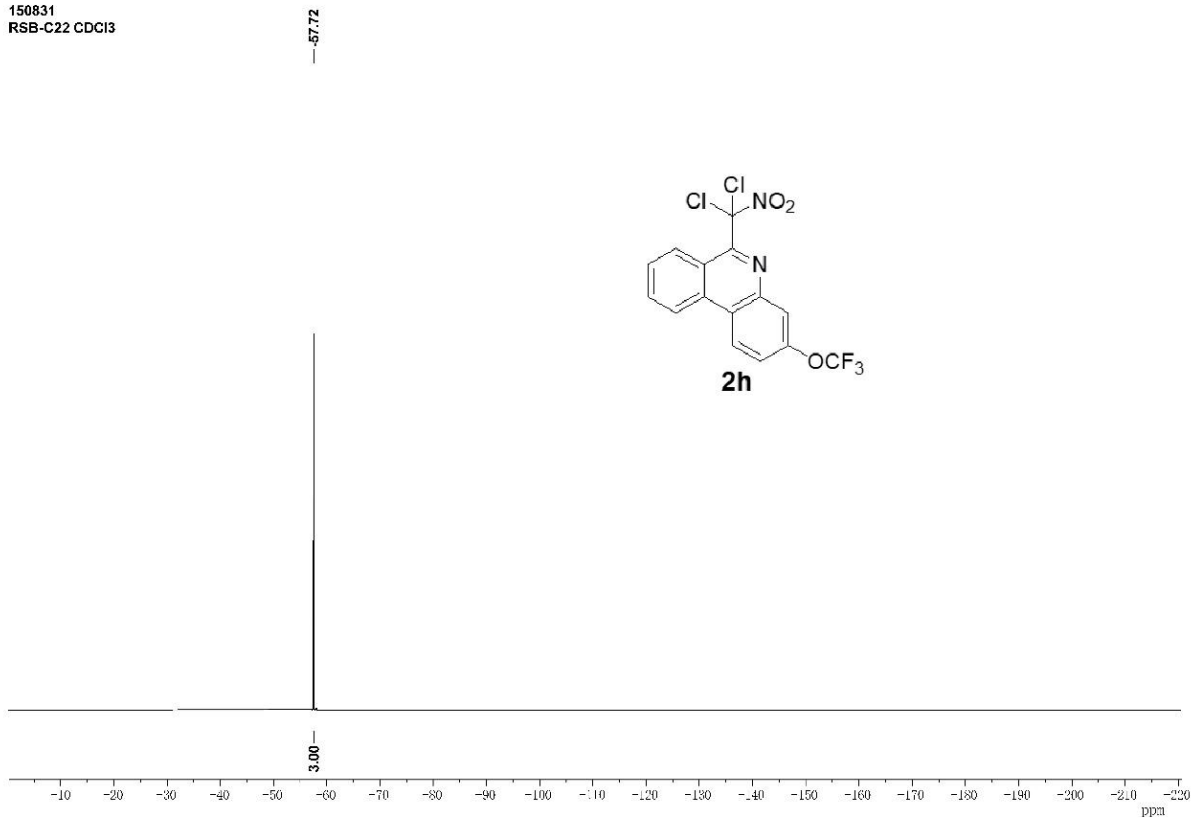

151109  
RSB-C23-11 CDCl3

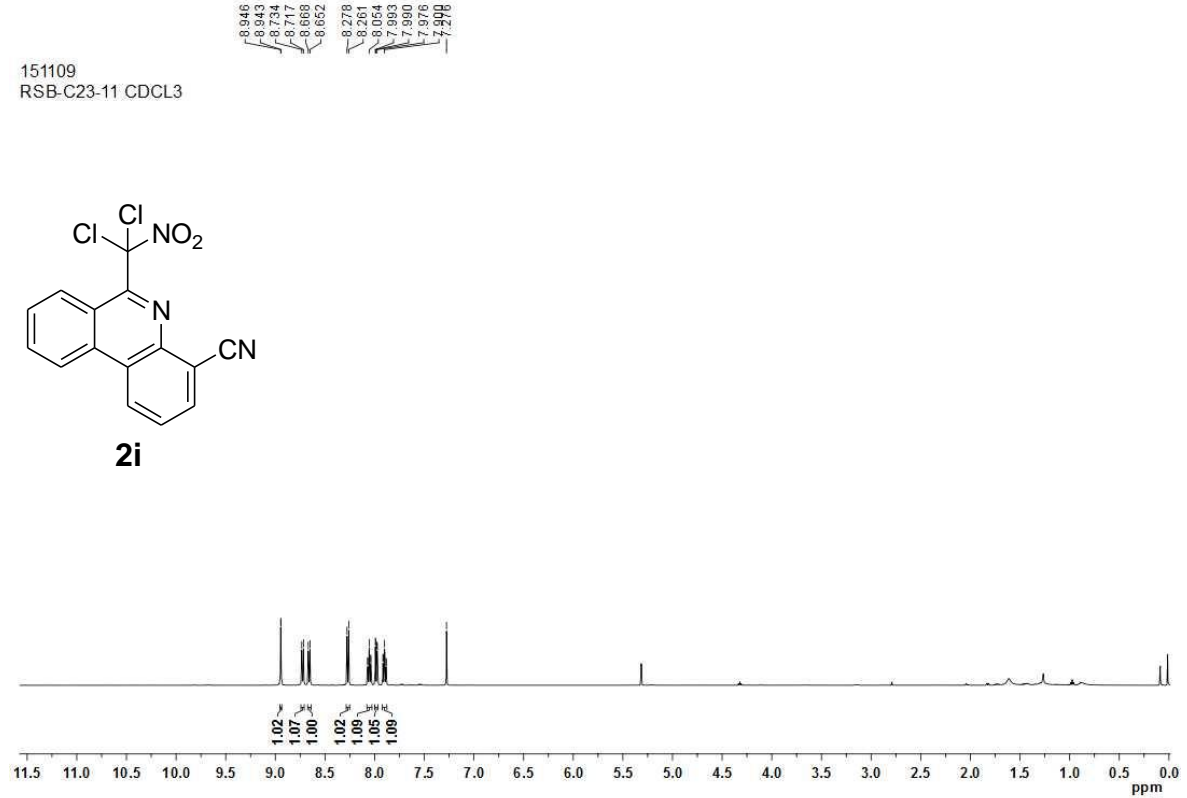

151109  
RSB-C23-11 CDCl<sub>3</sub>

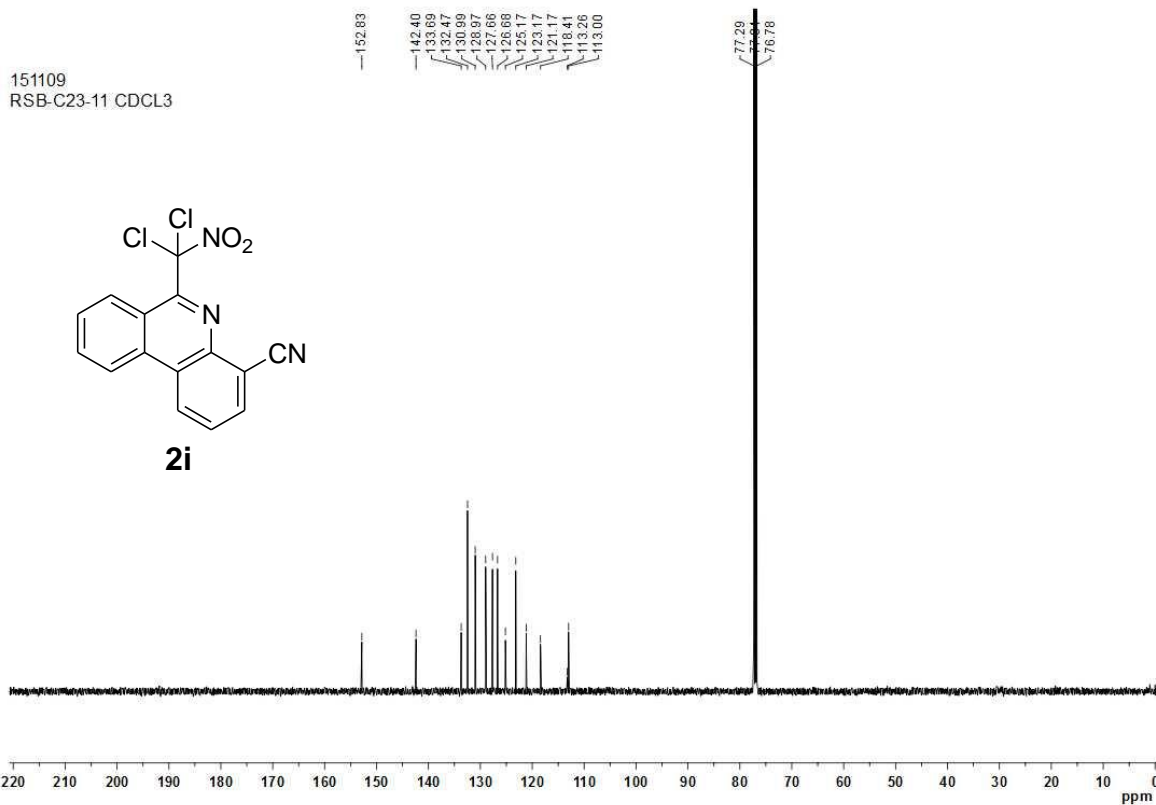

150612  
RSB-C08 CDCl<sub>3</sub>

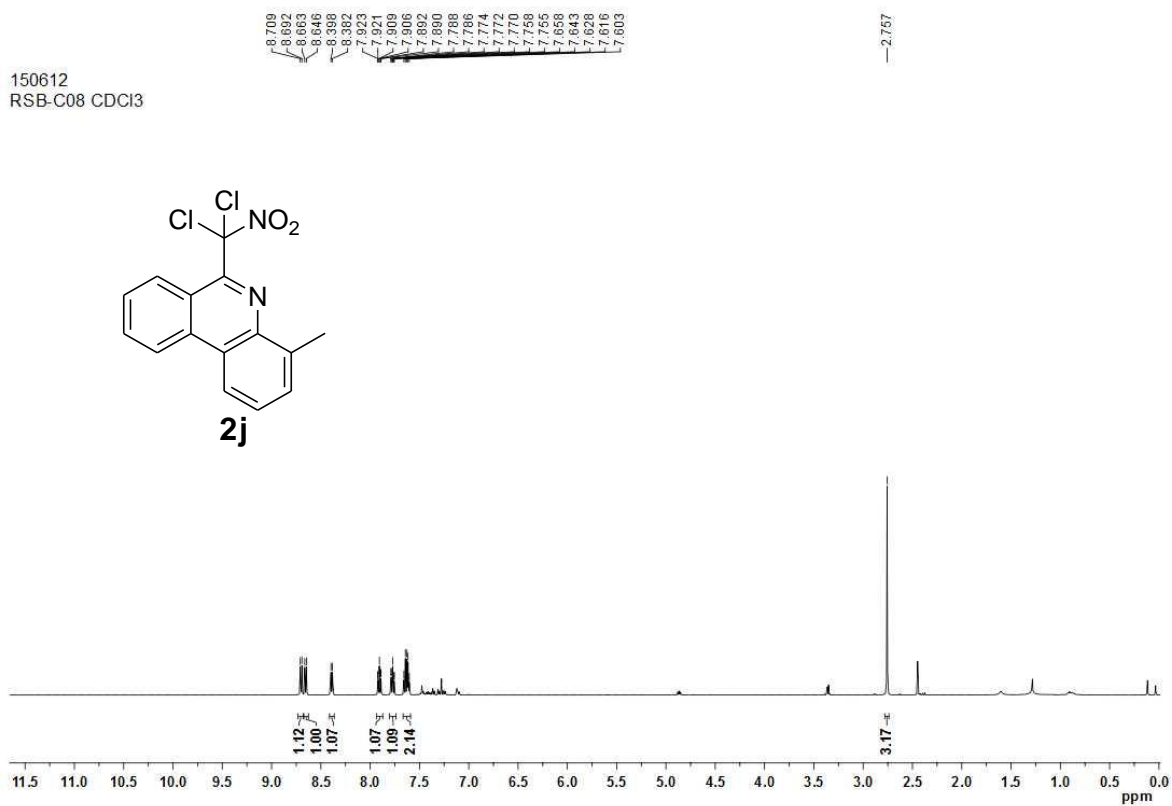

150707  
RSB-08 CDCl<sub>3</sub>

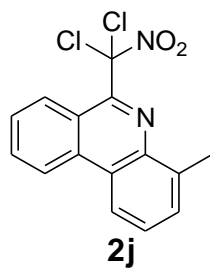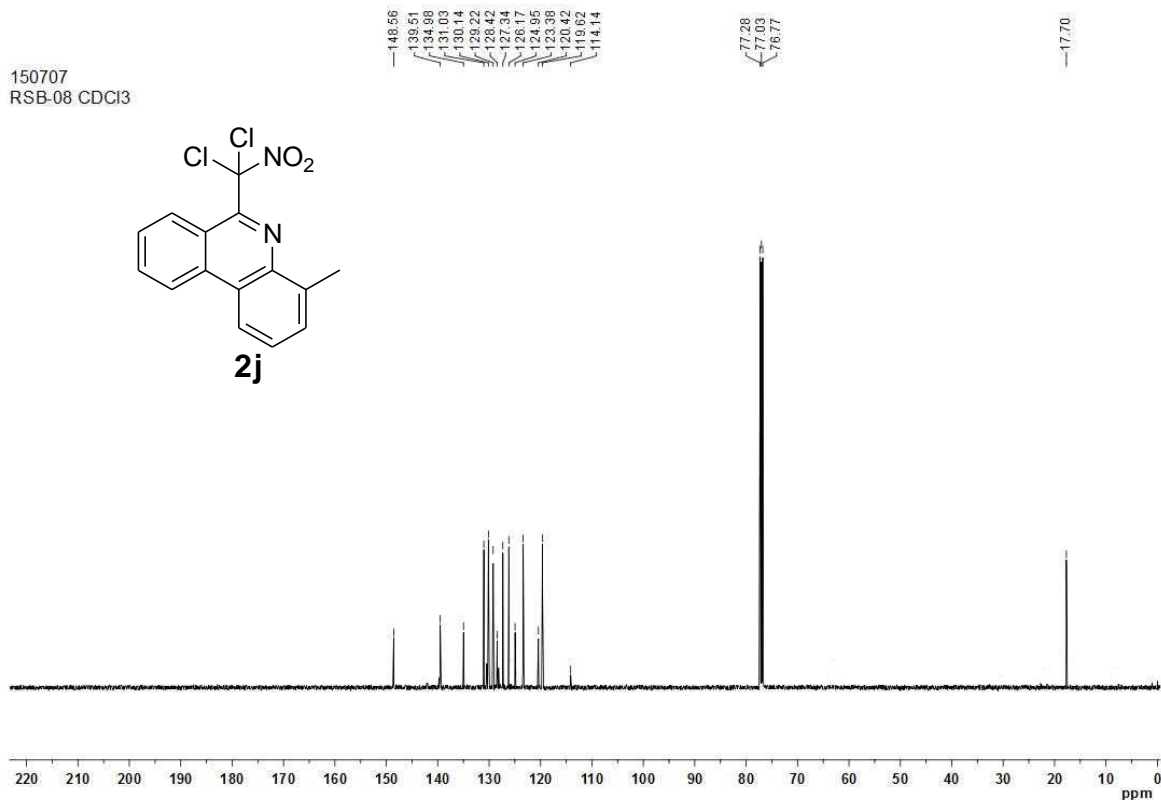

150706  
RSB-C11 CDCl<sub>3</sub>

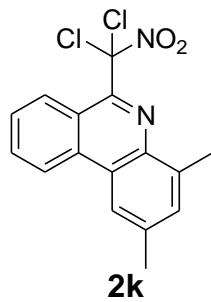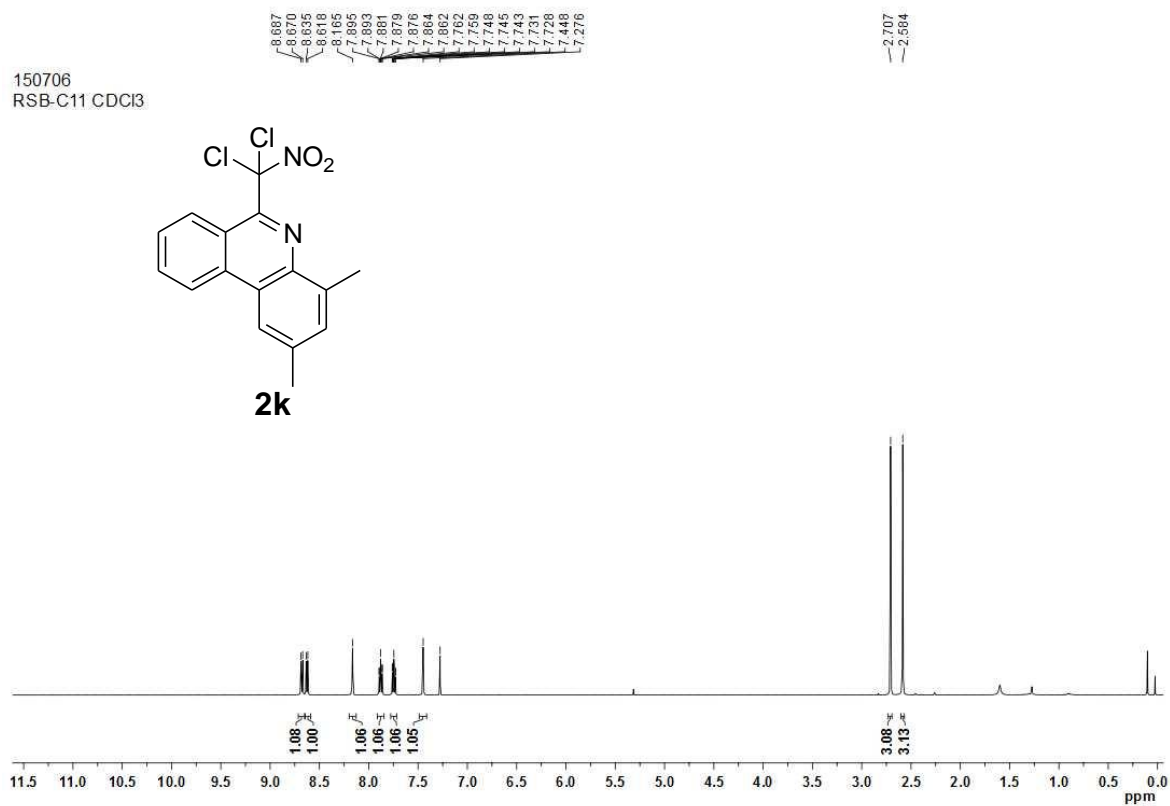



150707  
RSB-11 CDCl3

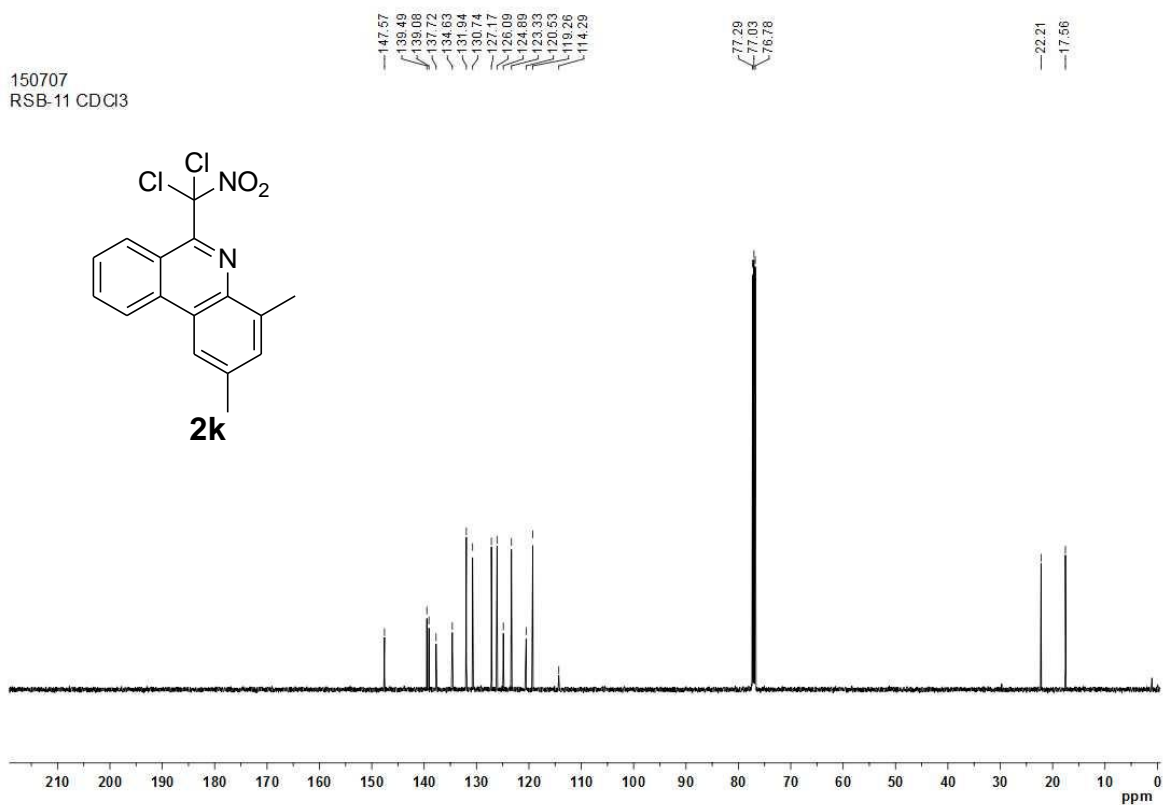

150710  
RSB-C14 CDCl3

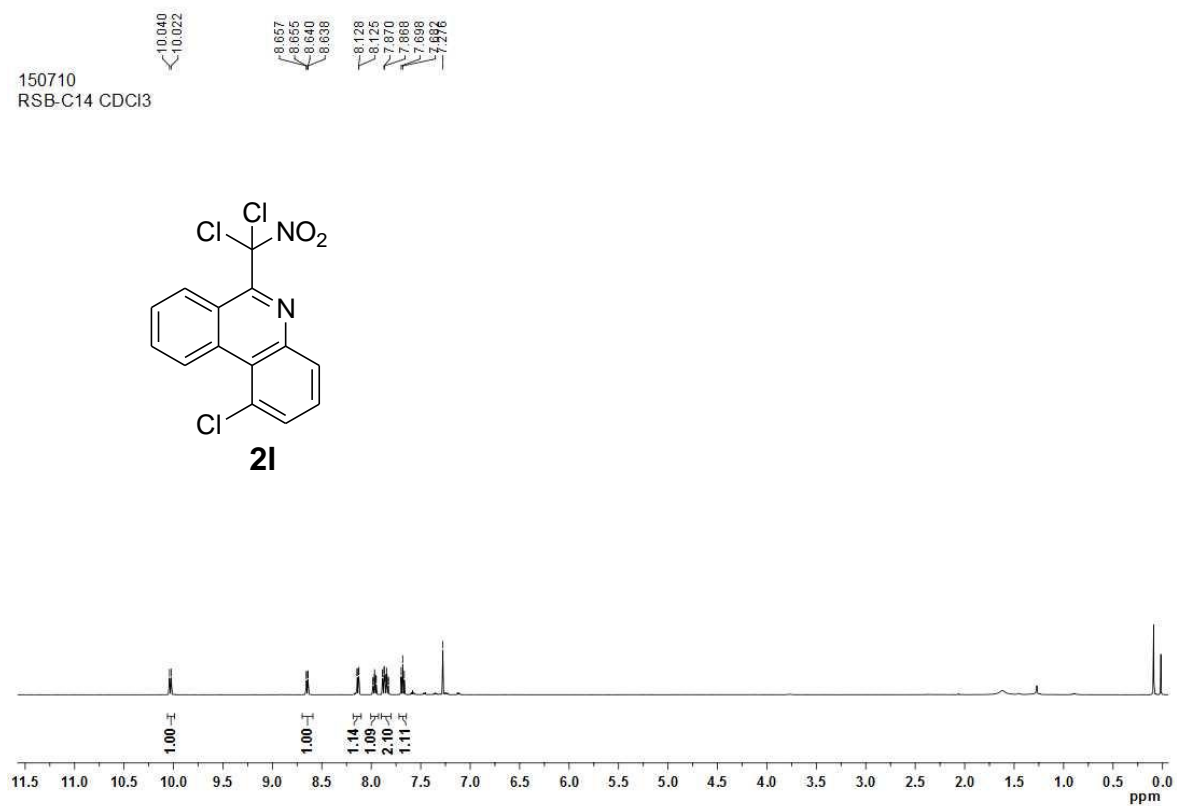

150714  
RSB-C14 CDCl3

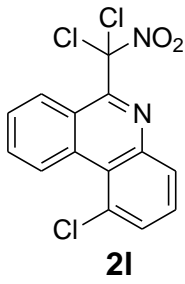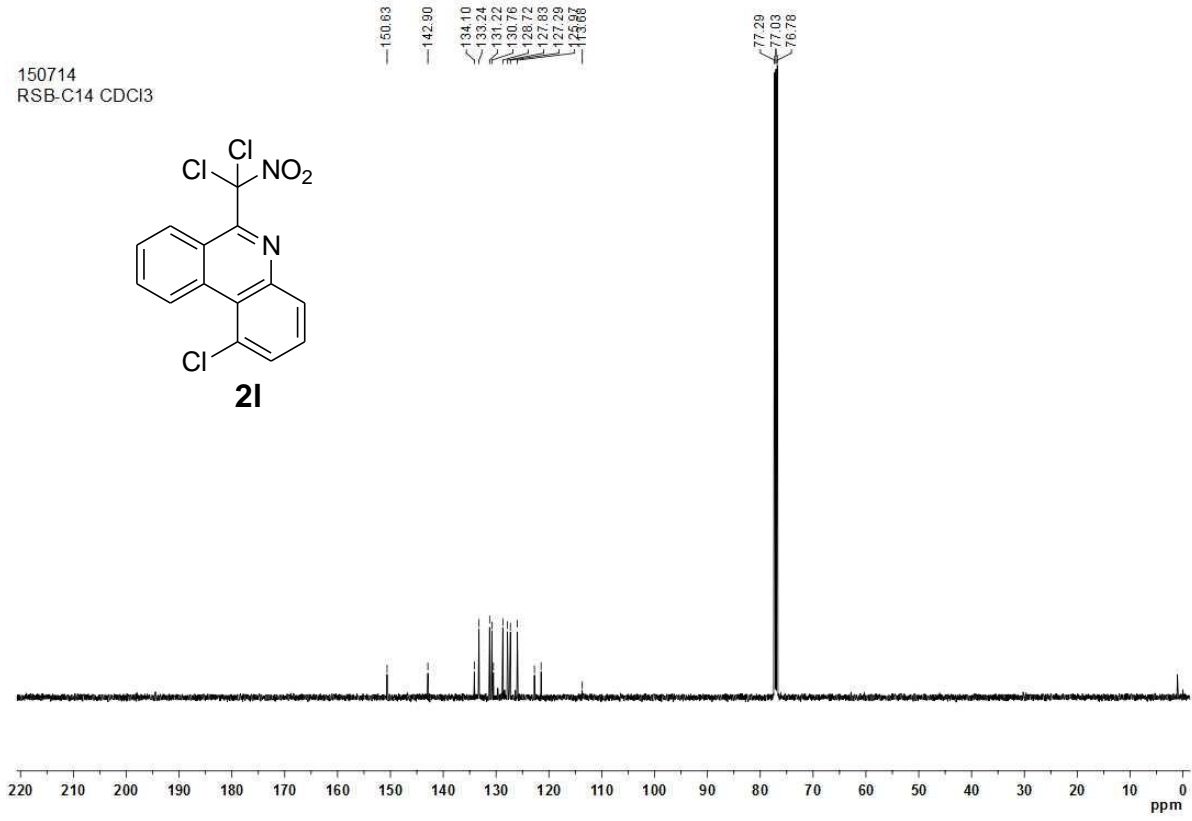

150605  
RSB-C06 CDCl3

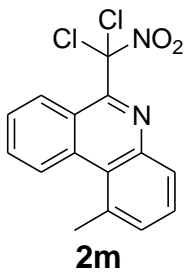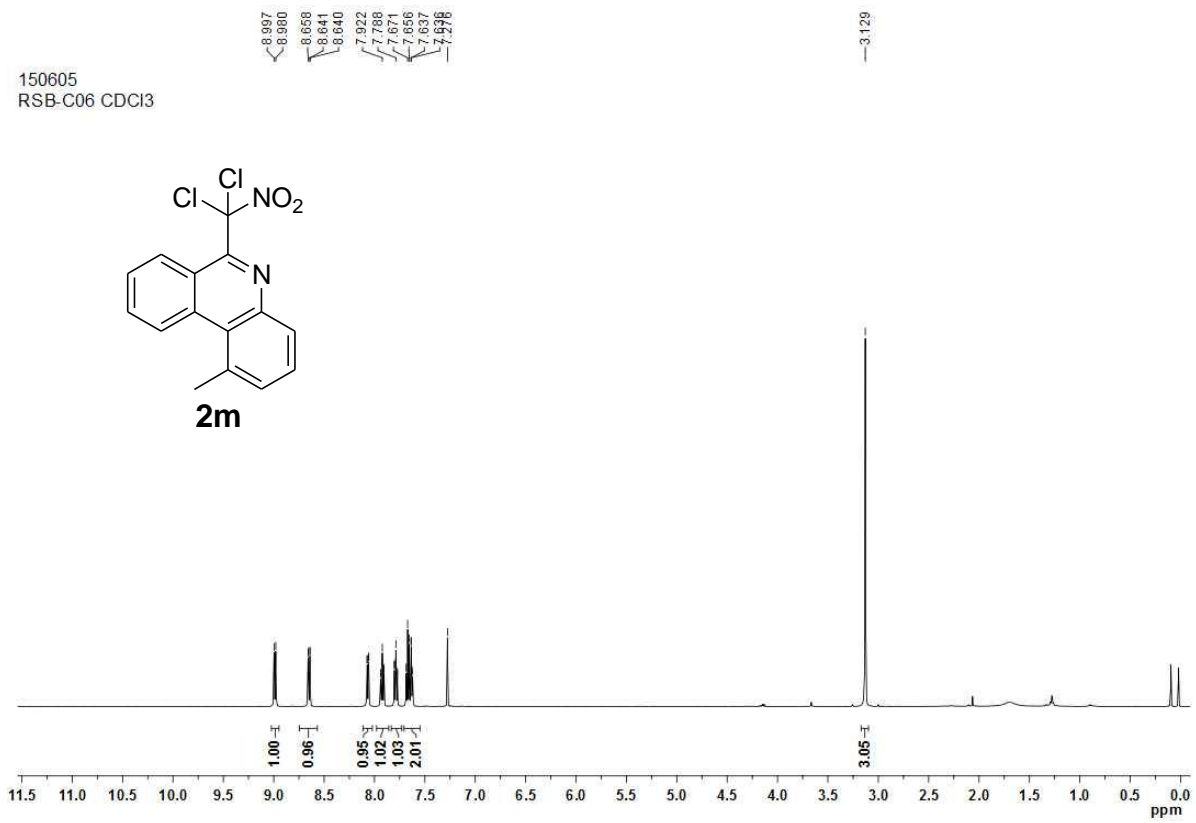

150605  
RSB-C06 CDCl3

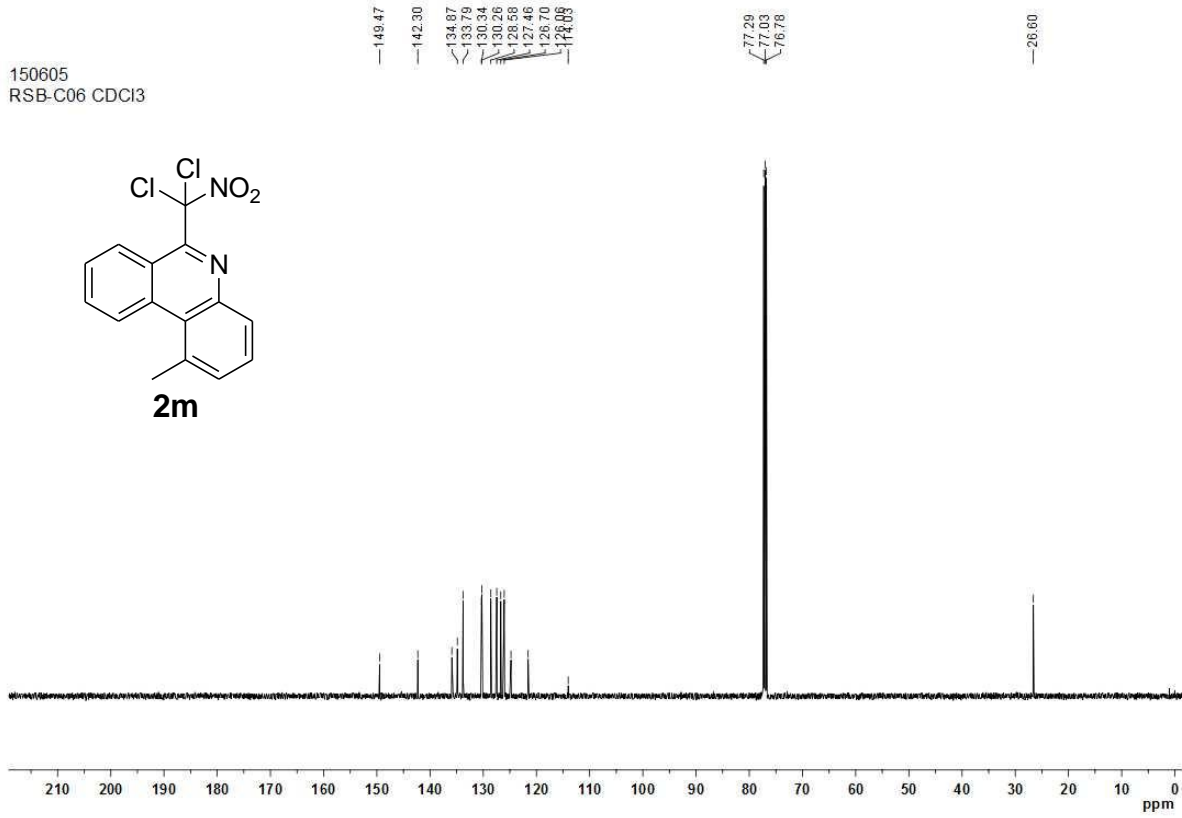

150819  
RSB-C19 CDCl3

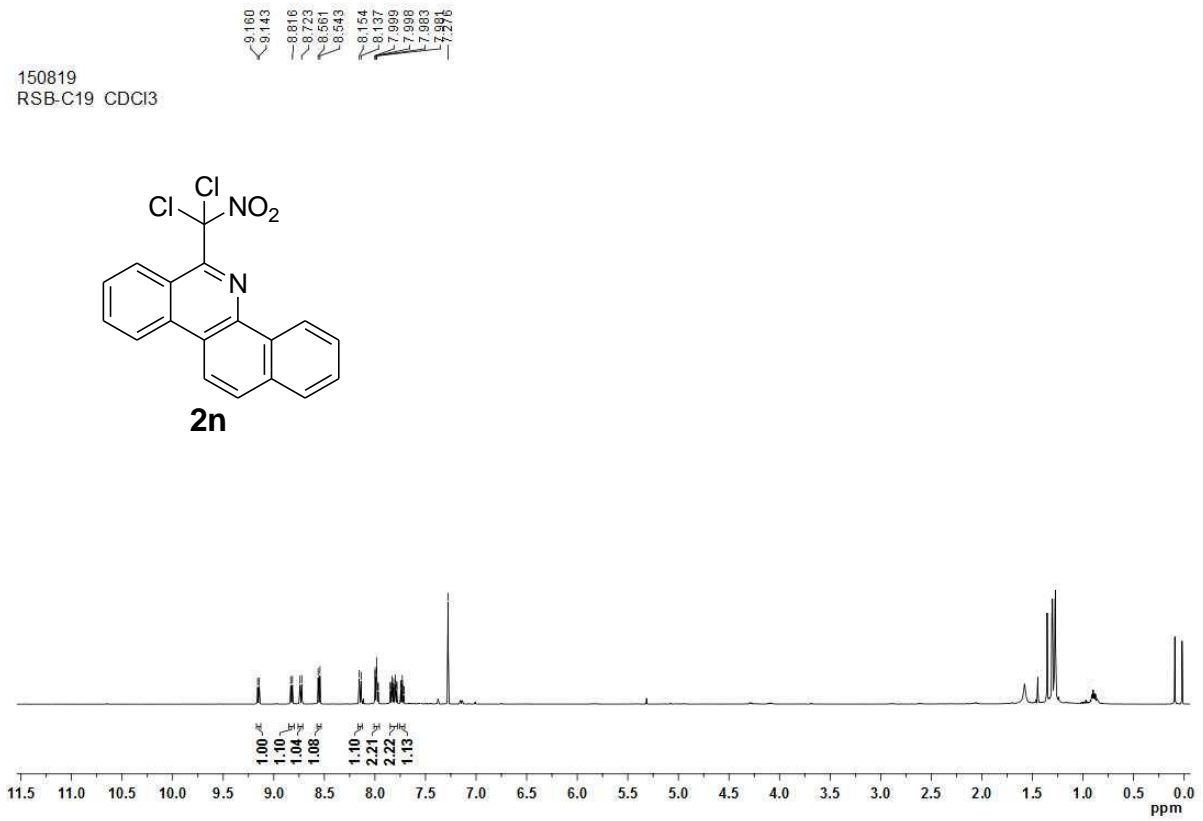

150821  
RSB-C19 CDCl3

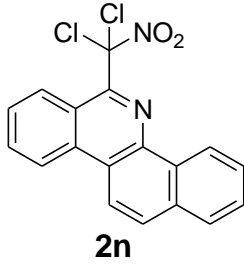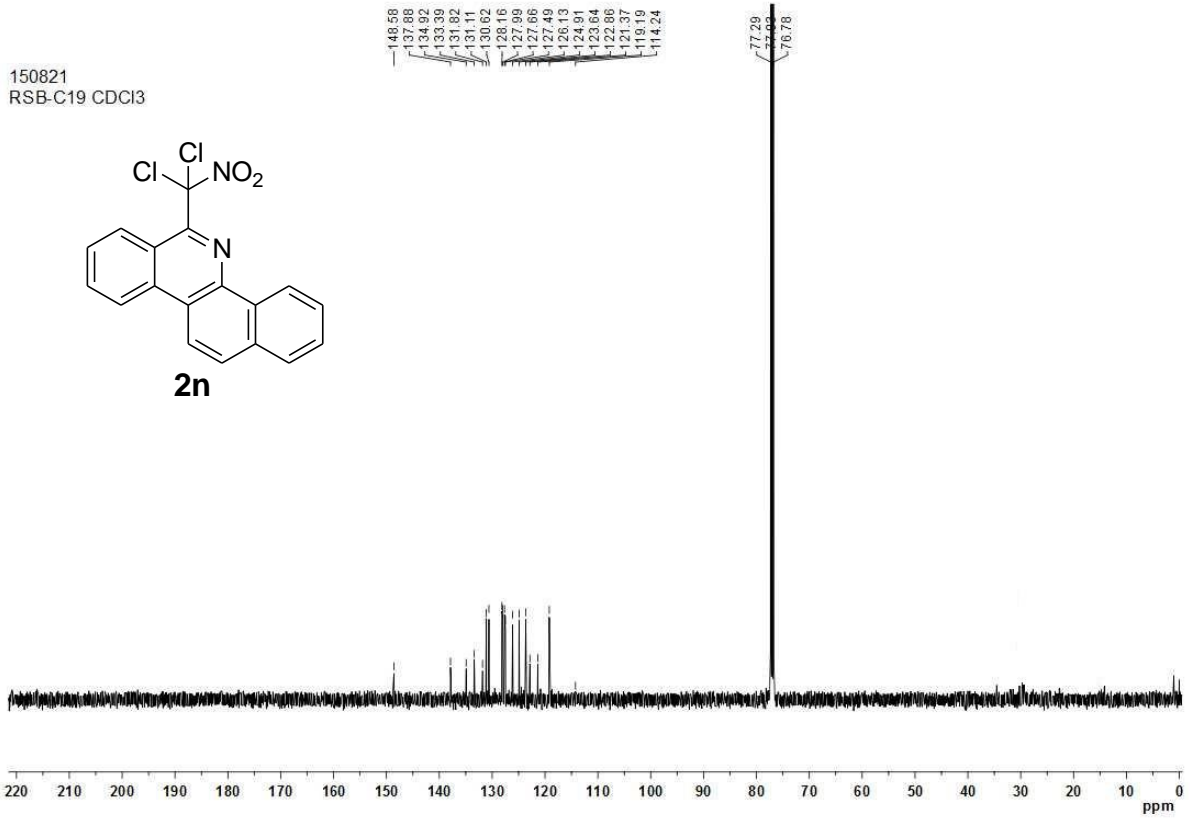

150506  
NCS CDCl3

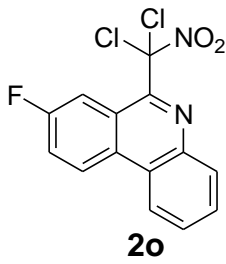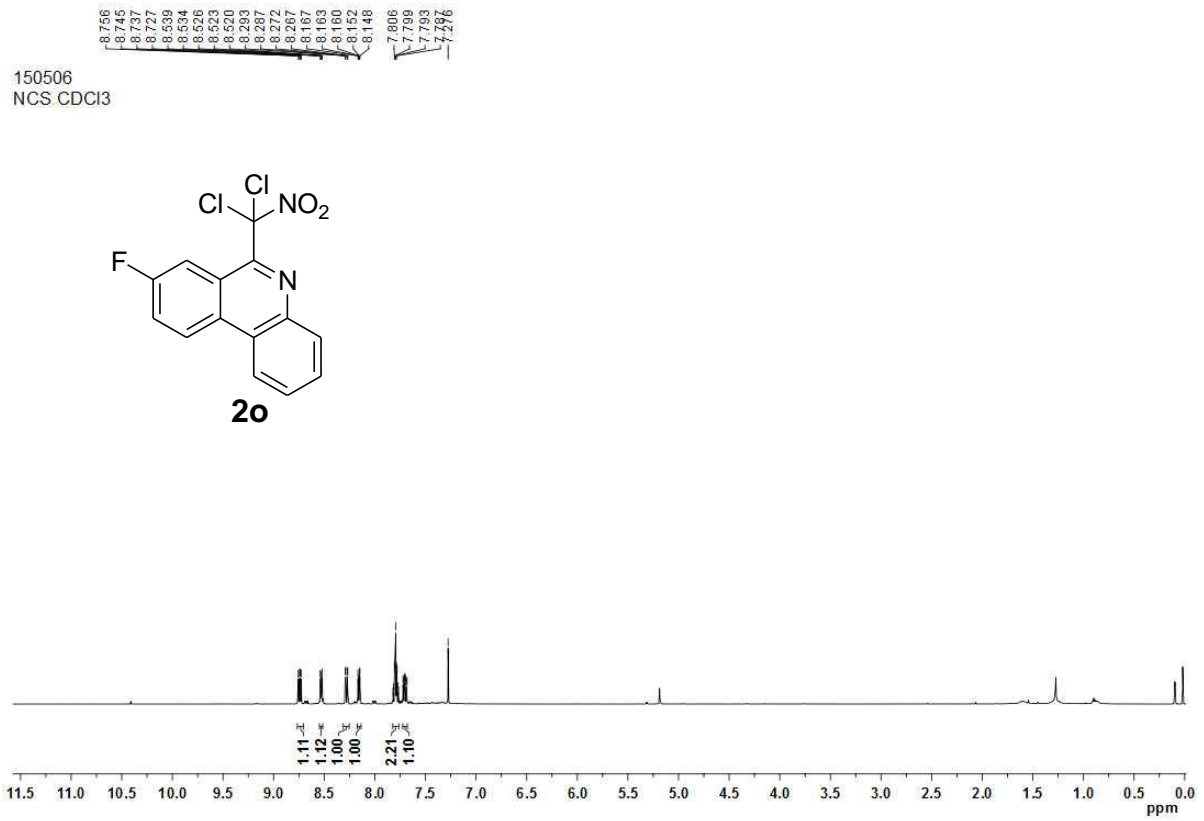

150506  
NCS CDCl<sub>3</sub>

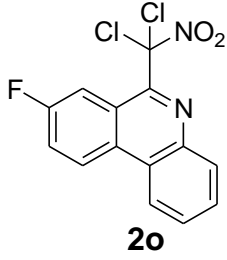

161.81  
159.82  
149.14  
149.10  
140.46  
131.45  
129.96  
129.44  
125.81  
121.71  
120.89  
119.70  
115.49  
111.30  
84.99  
80.56  
77.28  
77.03  
76.77

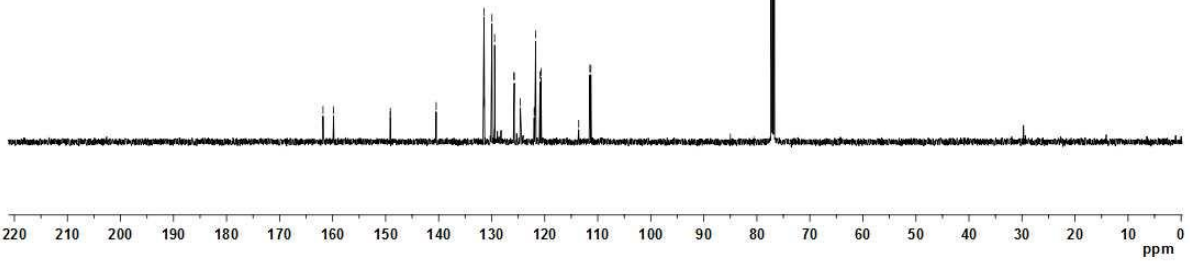

150506  
NCS CDCl<sub>3</sub>

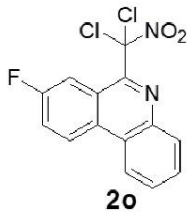

-109.15

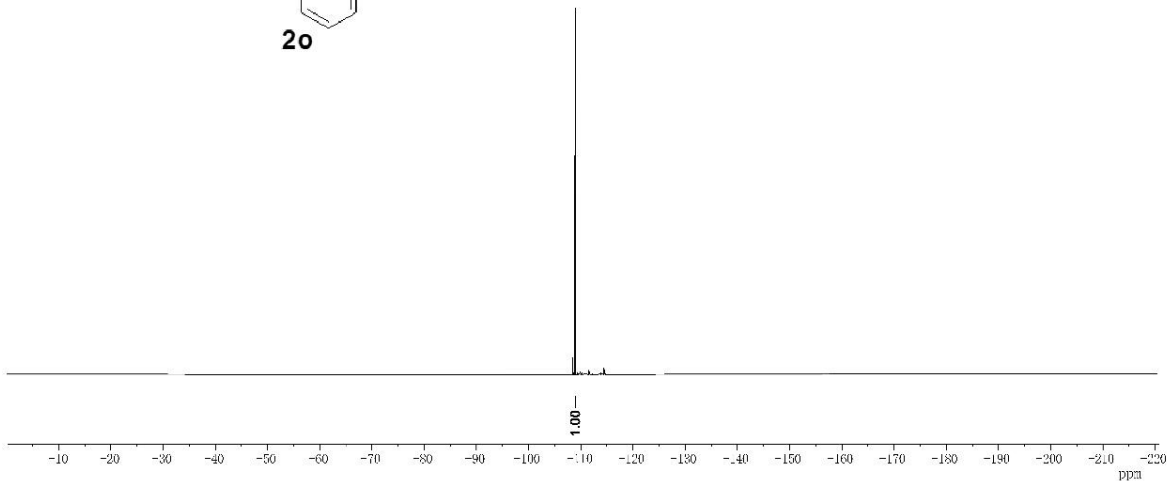

150821  
RSB-C20 CDCl3

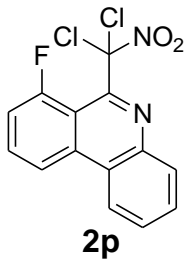

8.567  
8.564  
8.551  
8.548  
8.535  
8.294  
8.290  
8.279  
8.277  
8.275  
7.854  
7.849  
7.841  
7.427  
7.425  
7.417  
7.415  
7.402  
7.400  
7.276

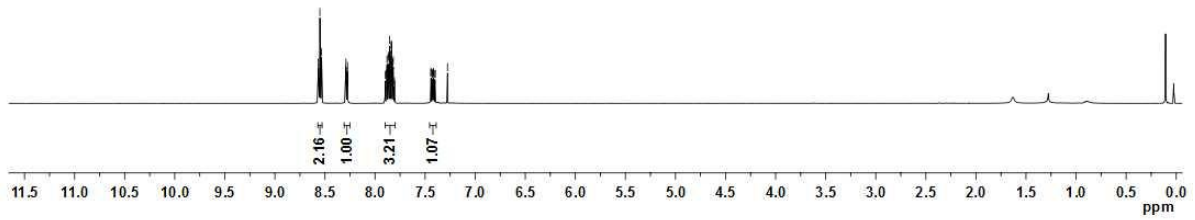

150824  
RSB-C20 CDCl3

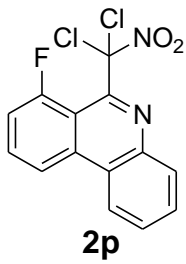

158.80  
156.58  
146.36  
146.33  
141.18  
136.66  
136.64  
132.13  
132.05  
131.33  
130.09  
123.86  
123.84  
122.38  
119.31  
119.28  
114.87  
113.76  
111.69  
111.52  
77.28  
77.03  
76.78

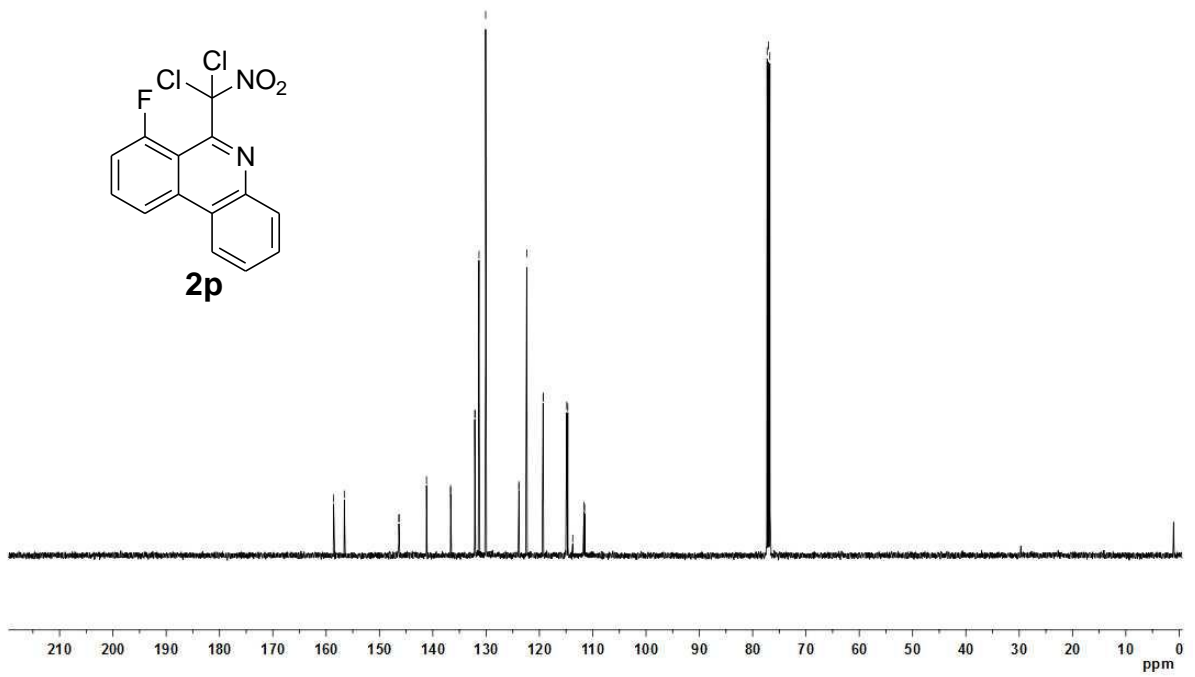

150821  
RSB-C20 CDCl3

— 99.15

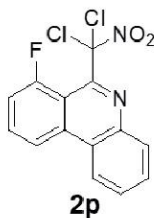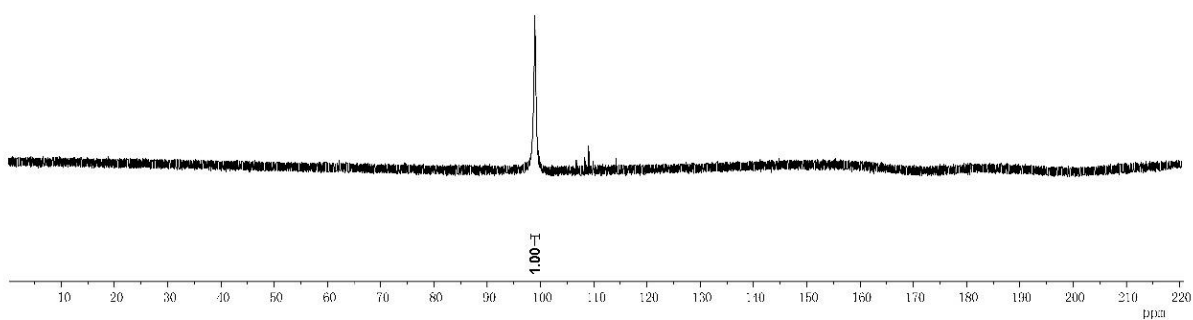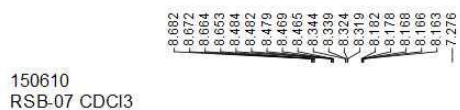

150610  
RSB-07 CDCl3

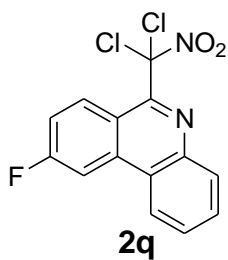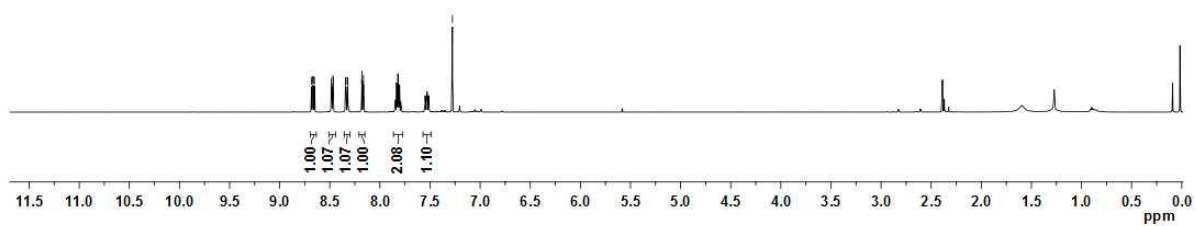

150611  
RSB-C07 CDCl3

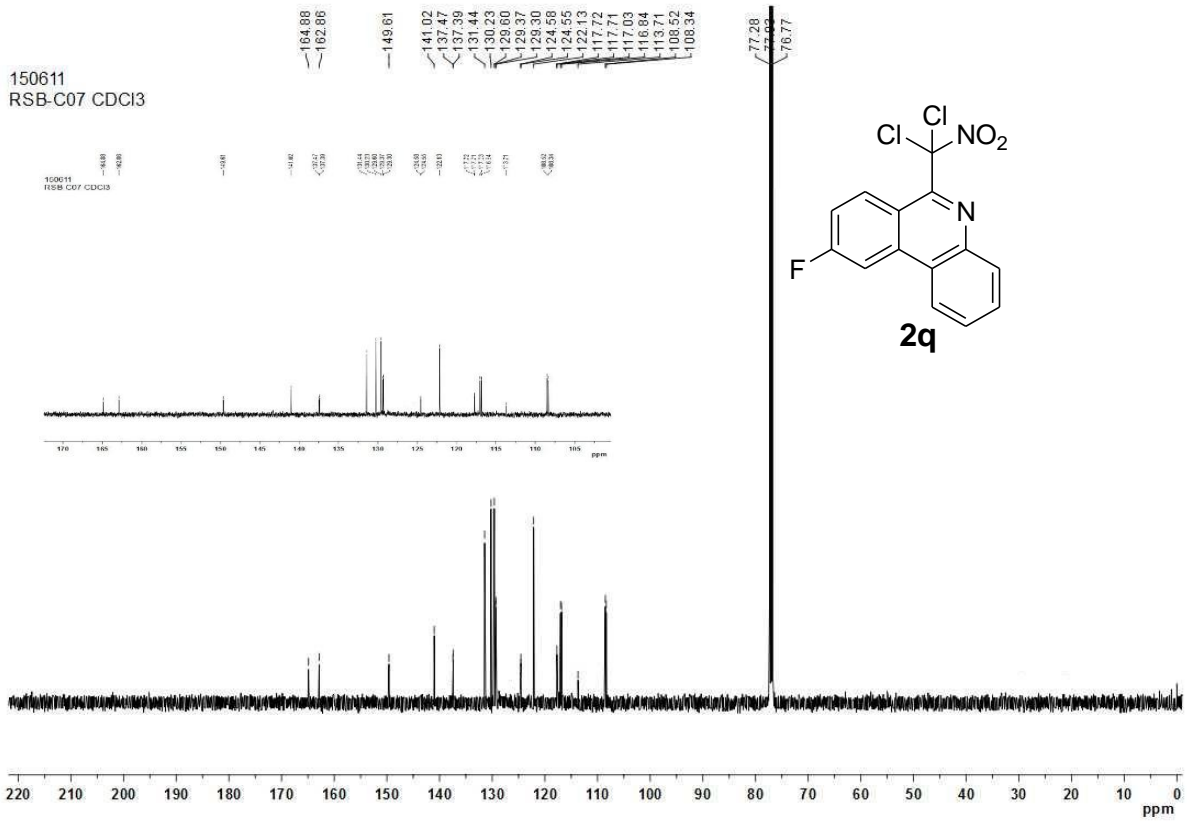

150610  
RSB-C07 CDCl3

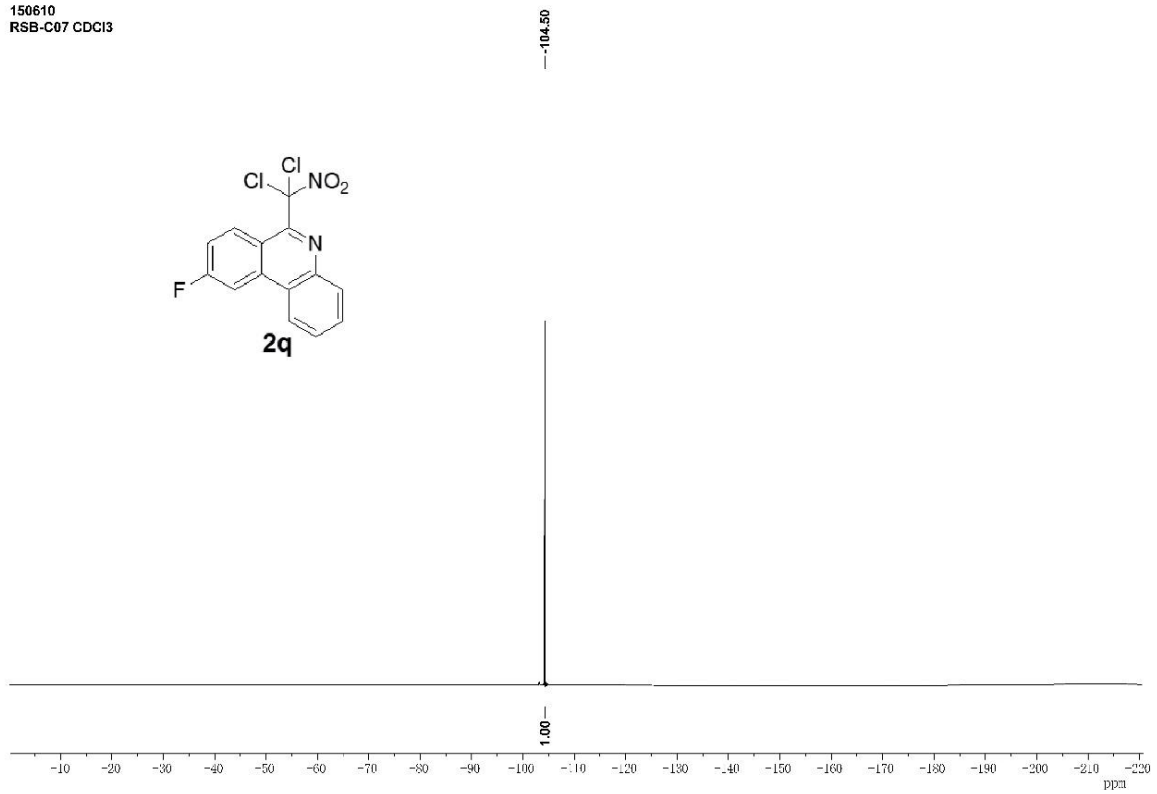



150722  
RSB-C17 CDCl3

8.668  
8.658  
8.650  
8.639  
8.378  
8.361  
8.262  
8.257  
8.242  
8.237  
7.828  
7.810  
7.807  
7.598

2.573

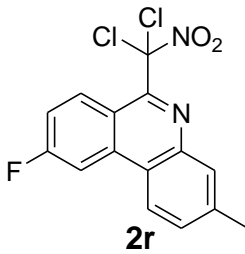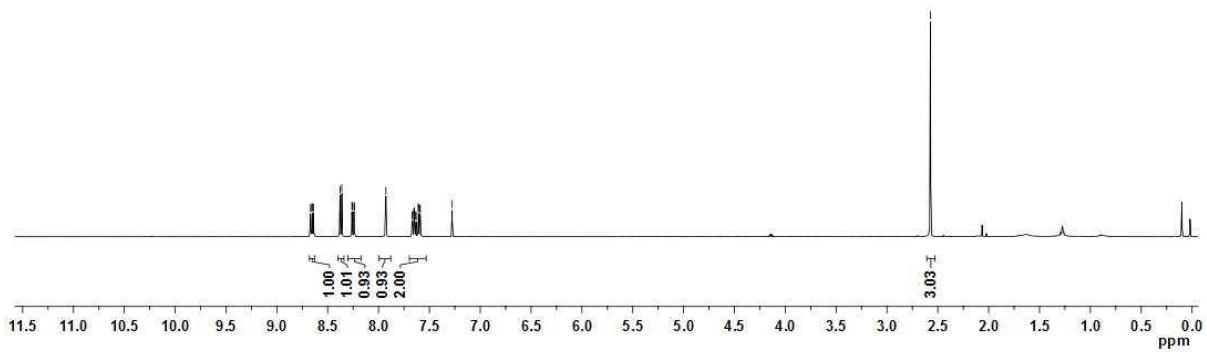

150723  
RSB-C17 CDCl3

161.47  
159.49  
149.07  
149.03  
140.56  
139.87  
131.74  
130.76  
125.55  
125.48  
121.43  
120.76  
119.66  
119.34  
111.15

77.29  
77.04  
76.78

21.32

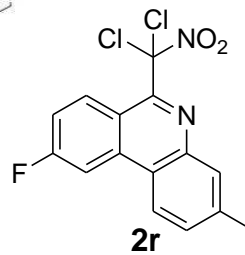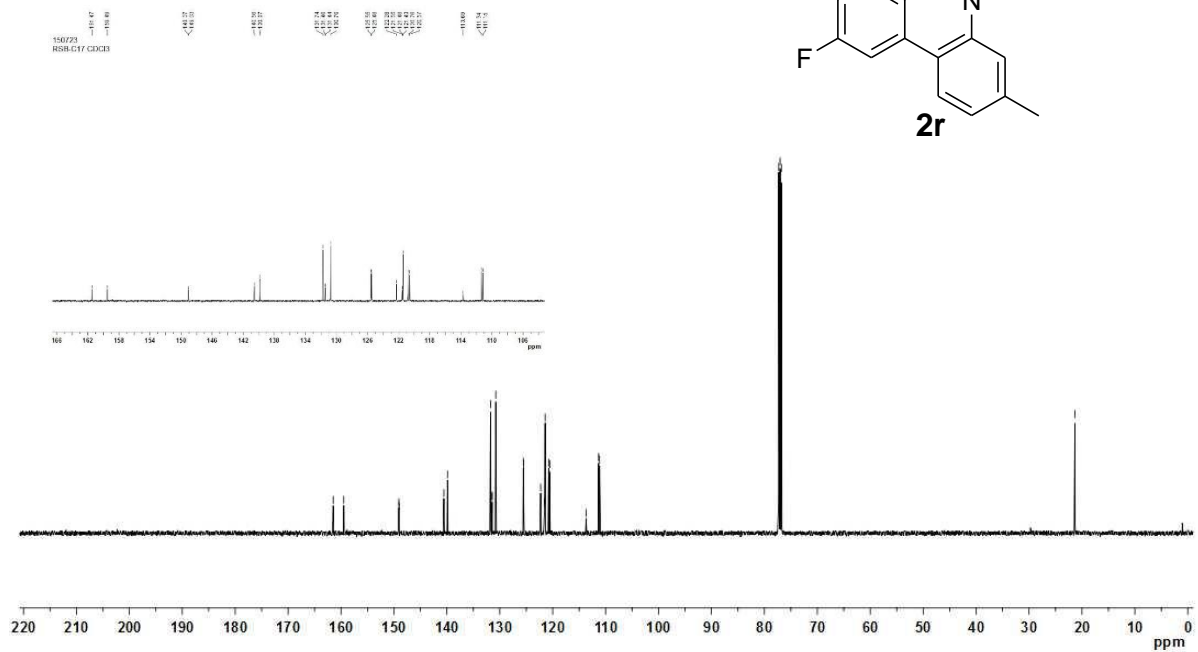

150722  
RSB-C17 CDCl3

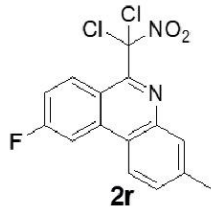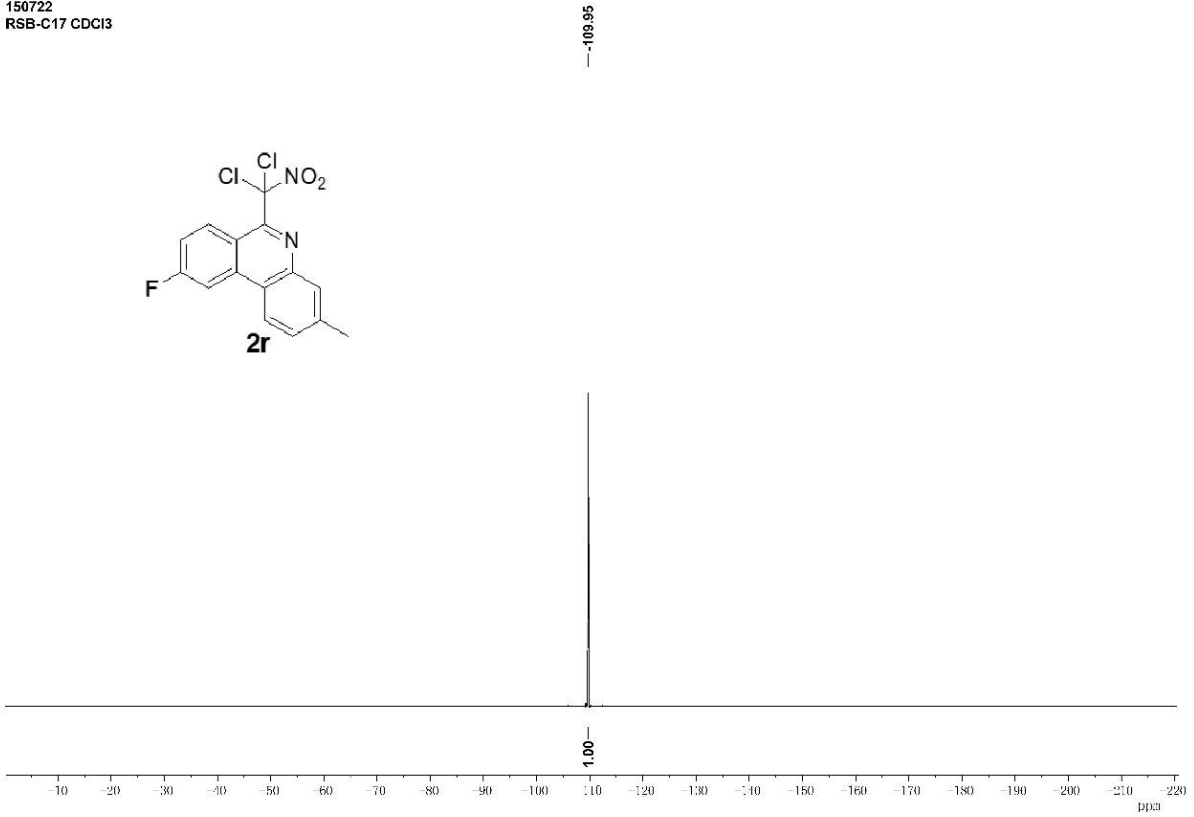

150925  
RSB-C-2 CDCl3

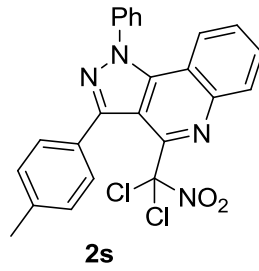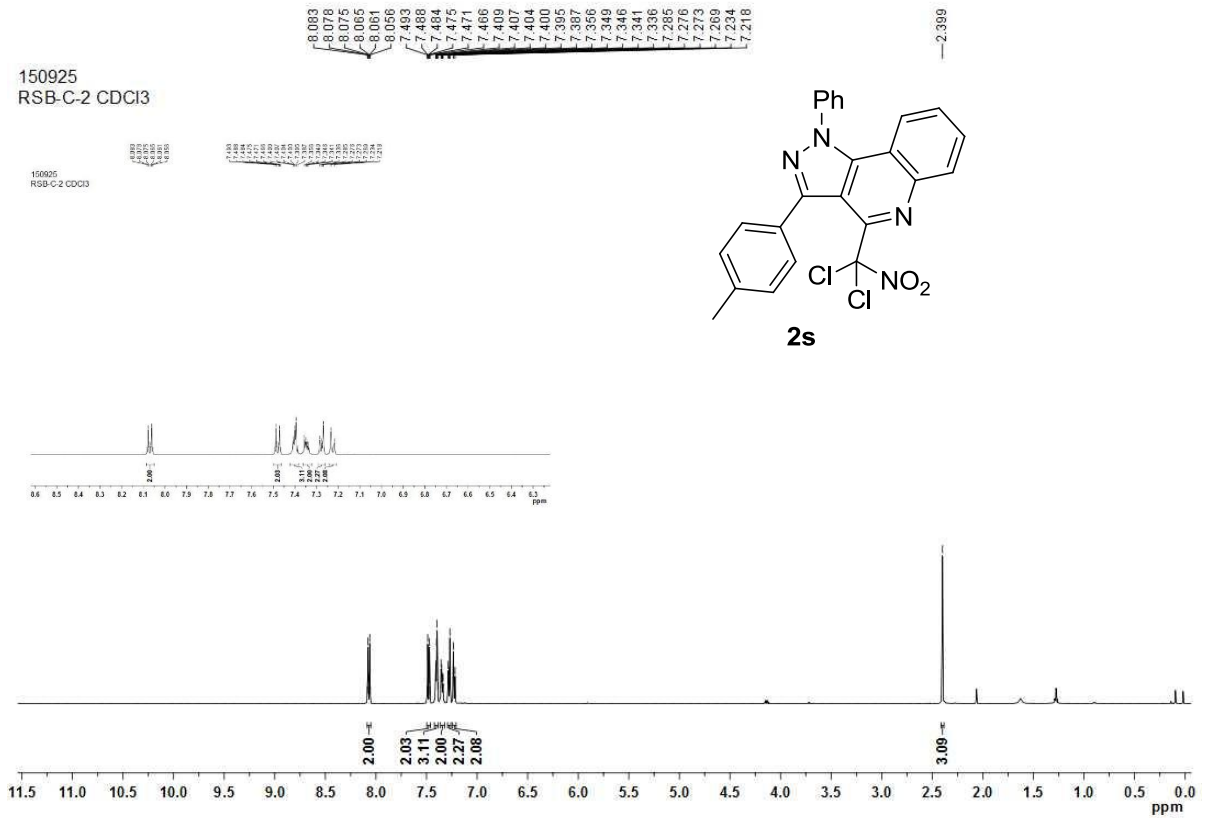

150928  
RSB-C-2 CDCl3

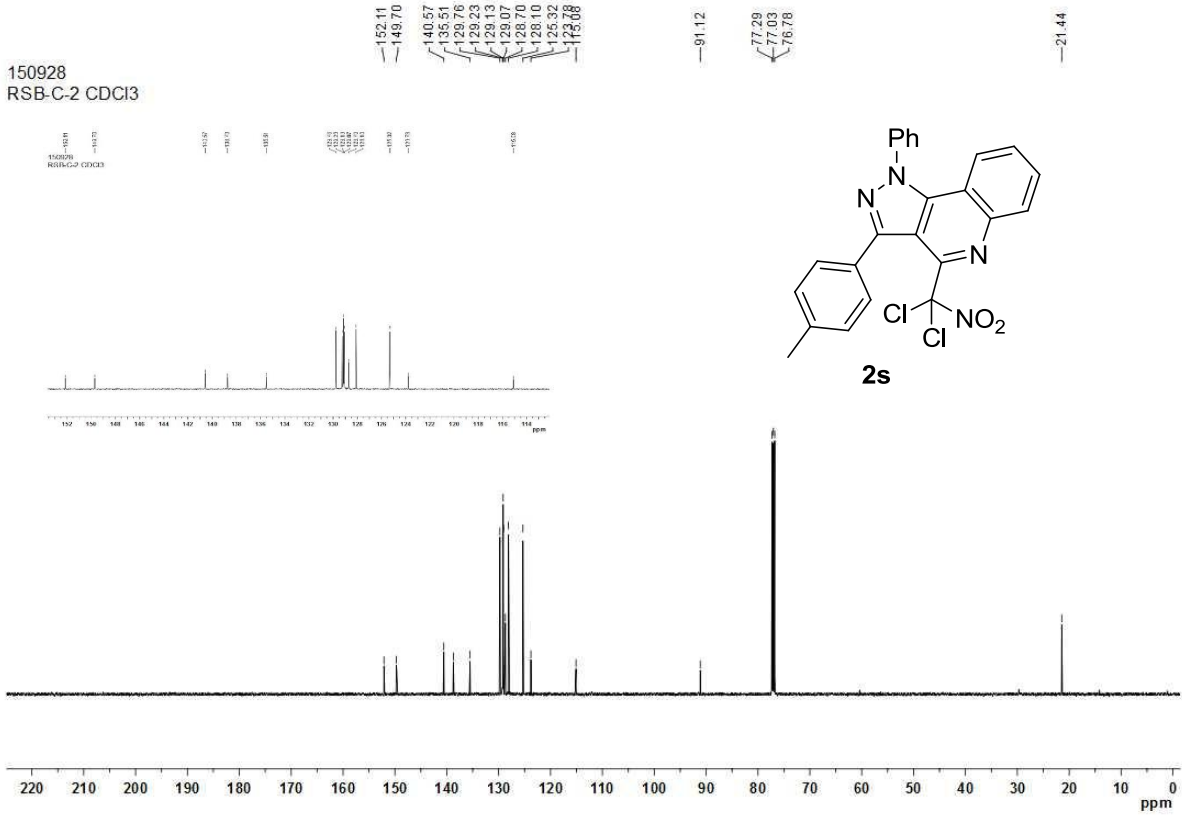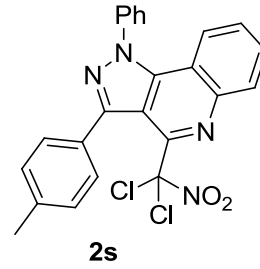

151208  
RSB-C25 CDCl3

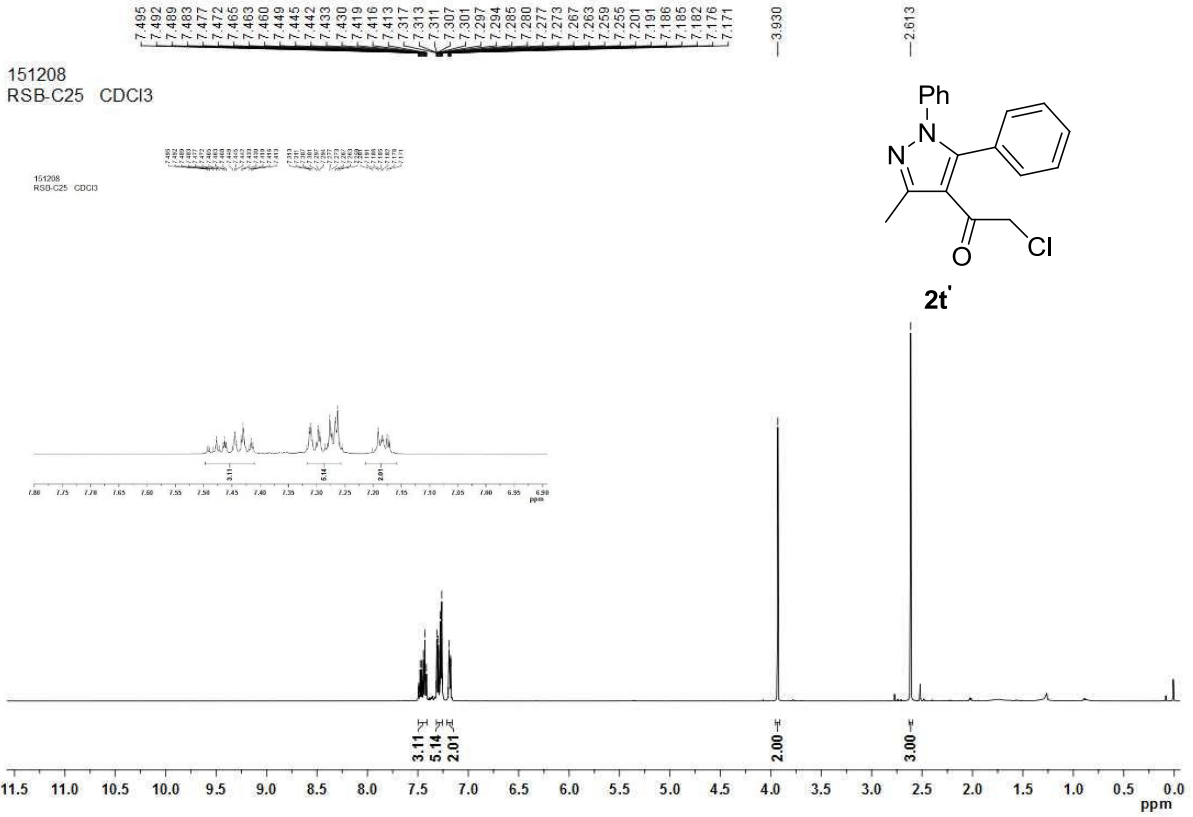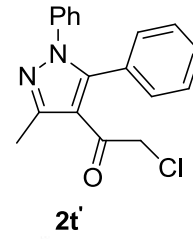

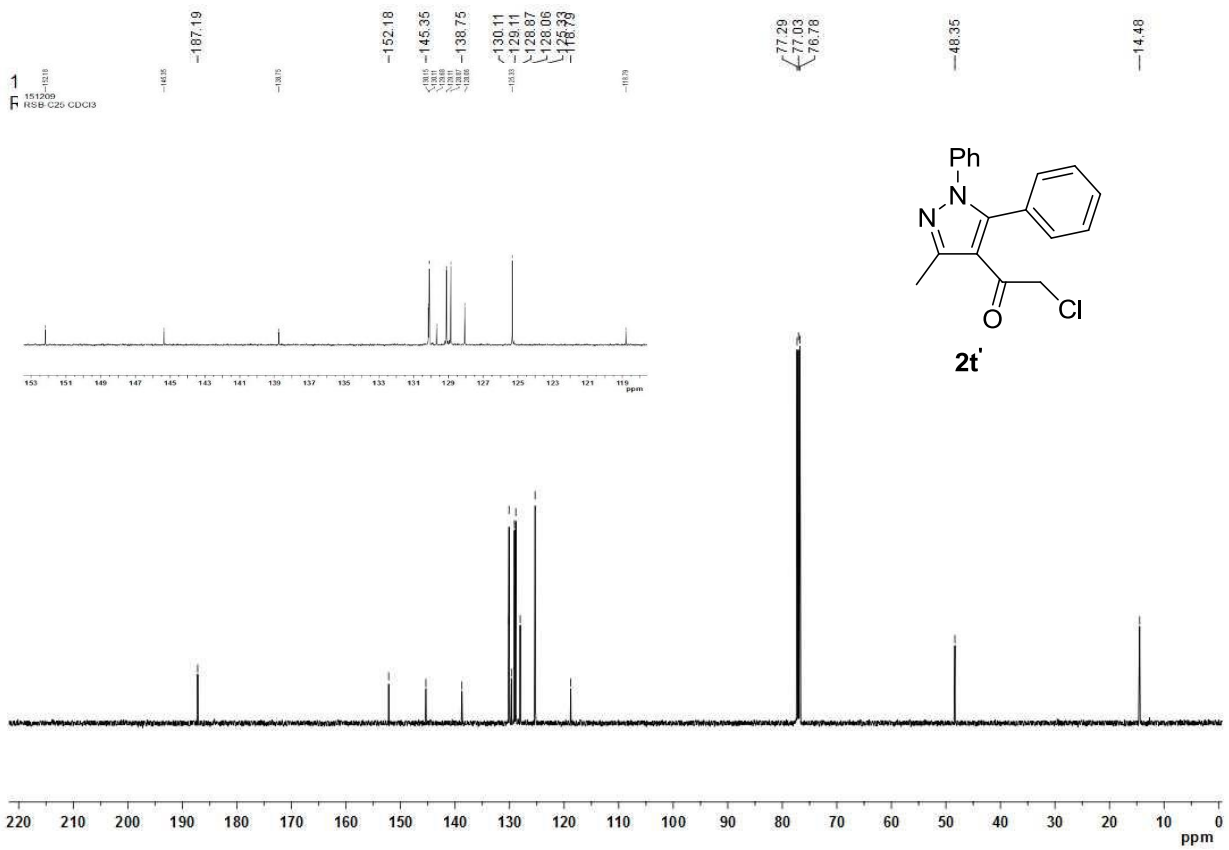

Supplement: d4ob00905c1.pdf [file d4ob00905c1.pdf]
